# Supplementary material for: Effects of wilting and additives on fermentation characteristics, microbial composition, metabolome, and ruminal degradation properties of mulberry silage
Source: Research Square preprint supplement (doi:10.21203/rs.3.rs-7345171/v1), 2025-09-11
Supplement: Supplementary file 1 [file 72e71f52596ac288f599bca3.docx]

**Table S1. Effects of wilting and additives on α-diversity of mulberry silage based on ASV level**

| Moisture | Additives1 | ACE | Chao1 | Sobs | Shannon | Simpson | Coverage |
| --- | --- | --- | --- | --- | --- | --- | --- |
| Fresh |  | 98.57a | 98.56a | 98.33a | 3.42 | 0.07 | 0.99 |
| Wilted |  | 76.06b | 75.81b | 75.67b | 3.09 | 0.10 | 0.99 |
| SEM |  | 5.886 | 5.871 | 5.903 | 0.160 | 0.015 | <0.001 |
|  | Control | 89.06 | 89.00 | 89.00 | 3.65a | 0.05b | 0.99 |
|  | OA | 97.69 | 97.67 | 97.17 | 3.39a | 0.07ab | 0.99 |
|  | LP | 75.19 | 74.89 | 74.83 | 2.73b | 0.13a | 0.99 |
|  | SEM | 7.209 | 7.191 | 7.230 | 0.196 | 0.018 | <0.001 |
| Fresh | Control | 99.67 | 99.67 | 99.67 | 3.90 | 0.04 | 1.00 |
| Fresh | OA | 114.31 | 114.33 | 113.67 | 3.71 | 0.05 | 0.99 |
| Fresh | LP | 81.74 | 81.67 | 81.67 | 2.65 | 0.13 | 0.99 |
| Wilted | Control | 78.46 | 78.33 | 78.33 | 3.40 | 0.06 | 0.99 |
| Wilted | OA | 81.07 | 81.00 | 80.67 | 3.07 | 0.10 | 0.99 |
| Wilted | LP | 68.64 | 68.11 | 68.00 | 2.80 | 0.13 | 0.99 |
| SEM |  | 10.195 | 10.169 | 10.224 | 0.277 | 0.025 | <0.001 |
| *P*-value |  |  |  |  |  |  |  |
| Moisture |  | 0.019 | 0.018 | 0.019 | 0.173 | 0.273 | 0.997 |
| Additives |  | 0.126 | 0.119 | 0.129 | 0.017 | 0.030 | 0.094 |
| M×A |  | 0.622 | 0.630 | 0.646 | 0.354 | 0.630 | 0.323 |

1OA: organic acid treatment consisted of a mixture of ammonium propionate, formic acid, and propionic acid at 9:7:1 ratio, 2 mL/kg of fresh matter; LP: *Lactobacillus plantarum* treatment, 108 cfu of Lactobacillus plantarum per g of fresh matter. SEM, standard error of the adjusted mean.  a-bMeans in a column not sharing alphabetic subscripts were different at the а = 0.05 level.

**Table S2. Effects of wilting and additives on genus level community composition abundance of mulberry silage**

| Moisture | Additives1 | Lactiplantibacillus | Levilactobacillus | Weissella | unclassified_  p_Cyanobacteria | Enterococcus | Enterobacter | Ligilactobacillus | Lactococcus | Companilactobacillus | unclassified_f_Enterobacteriaceae |
| --- | --- | --- | --- | --- | --- | --- | --- | --- | --- | --- | --- |
| Fresh |  | 46.29 | 17.96 | 9.53 | 6.09 | 4.61 | 2.06 | 0.83 | 1.24 | 1.58 | 1.32 |
| Wilted |  | 56.37 | 14.64 | 7.30 | 5.32 | 4.01 | 1.94 | 1.73 | 1.18 | 0.67 | 0.72 |
| SEM |  | 4.361 | 3.025 | 0.116 | 1.033 | 0.744 | 0.643 | 0.321 | 0.252 | 0.405 | 0.358 |
|  | Control | 44.37b | 22.02 | 11.36 | 5.00 | 5.17a | 1.75 | 0.72 | 1.20 | 2.47 | 1.62 |
|  | OA | 67.11b | 18.75 | 9.87 | 6.10 | 5.86a | 3.09 | 1.58 | 1.37 | 0.91 | 0.81 |
|  | LP | 42.51a | 8.12 | 4.01 | 6.01 | 1.90b | 1.16 | 1.55 | 1.06 | - | 0.62 |
|  | SEM | 5.341 | 3.705 | 2.382 | 1.265 | 0.912 | 0.787 | 0.393 | 0.308 | 0.496 | 0.438 |
| Fresh | Control | 43.10 | 19.88 | 13.43 | 2.56b | 6.01 | 1.52 | 0.99 | 1.11 | 3.81 | 1.83 |
| Fresh | OA | 30.19 | 21.91 | 14.24 | 7.33ab | 6.42 | 3.53 | 0.78 | 1.16 | 0.94 | 1.26 |
| Fresh | LP | 65.60 | 12.09 | 0.90 | 8.38a | 1.39 | 1.11 | 0.73 | 1.45 | - | 0.84 |
| Wilted | Control | 45.65 | 24.17 | 9.29 | 7.44ab | 4.32 | 1.98 | 0.45 | 1.27 | 1.13 | 1.42 |
| Wilted | OA | 54.84 | 15.59 | 5.50 | 4.87ab | 5.30 | 2.64 | 2.39 | 1.59 | 0.88 | 0.36 |
| Wilted | LP | 68.62 | 4.15 | 7.11 | 3.65ab | 2.40 | 1.21 | 2.36 | 0.67 | - | 0.39 |
| SEM |  | 7.553 | 5.240 | 3.368 | 1.788 | 1.289 | 1.113 | 0.556 | 0.436 | 0.701 | 0.619 |
| *P*-value |  |  |  |  |  |  |  |  |  |  |  |
| Moisture |  | 0.128 | 0.453 | 0.434 | 0.606 | 0.581 | 0.902 | 0.070 | 0.859 | NA | 0.262 |
| Additives |  | 0.012 | 0.051 | 0.110 | 0.794 | 0.021 | 0.248 | 0.255 | 0.773 | NA | 0.265 |
| M×A |  | 0.285 | 0.471 | 0.117 | 0.048 | 0.561 | 0.823 | 0.124 | 0.374 | NA | 0.910 |

1OA: organic acid treatment consisted of a mixture of ammonium propionate, formic acid, and propionic acid at 9:7:1 ratio, 2 mL/kg of fresh matter; LP: *Lactobacillus plantarum* treatment, 108 cfu of *Lactobacillus plantarum* per g of fresh matter. -: not detected. NA: not available due to non-detectable data. a-bMeans in a column not sharing alphabetic subscripts were different at the а = 0.05 level.

**Table S3.** Analysis and classification of differential metabolite metabolic pathways

| No. | differential metabolites | metabolic pathways | Pathway  ID | *P* valule | Group |
| --- | --- | --- | --- | --- | --- |
| 1 | 15-Hydroxynorandrostene-3,17-dione glucuronide and ascorbic acid | Ascorbate and aldarate metabolism | ko00053 | 0.002 | FO vs FC |
| L-Cysteine and (R)-pantoate | Pantothenate and CoA biosynthesis | Ko02060 | 0.007 |
| Salicin and ascorbic acid | Phosphotransferase system (PTS) | Ko00770 | 0.024 |
| 2 | 15-Hydroxynorandrostene-3,17-dione glucuronide and ascorbic acid | Ascorbate and aldarate metabolism | ko00053 | 0.012 | FL vs FC |
| L-(+)-Arginine and Citrulline | Arginine biosynthesis | ko00260 | 0.012 |
| Salicin, Chitobiose and ascorbic acid | Phosphotransferase system (PTS) | ko02060 | 0.015 |
| 3 | Indoxyl and 5-Hydroxyindoleacetylglycine | Tryptophan metabolism | ko00380 | 0.026 | FO vs FL |
| 4 | Ascorbic acid | Ascorbate and aldarate metabolism | ko00053 | <0.001 | WO vs WC |
| Ascorbic acid | Phosphotransferase system (PTS) | ko02060 | 0.017 |
| 5 | 5-Hydroxynorandrostene-3,17-dione glucuronide and ascorbic acid | Ascorbate and aldarate metabolism | ko00053 | <0.001 | WL vs WC |
| Cis-Aconitic Acid | Citrate cycle (TCA cycle) | ko00020 | 0.060 |
| (R)-pantoate | Pantothenate and CoA biosynthesis | ko00770 | 0.089 |
| 6 | N-Hydroxy-L-tyrosine | Cyanoamino acid metabolism | Ko00460 | 0.080 | WO vs WL |
| N-formimidoyl-glutamic acid | Histidine metabolism | Ko00340 | 0.083 |

FC: fresh control; FO: fresh OA; FL: fresh LAB; WC: wilted control; WO: wilted OA; WL: wilted LAB.
