# Supplementary material for: Effects of wilting and additives on fermentation characteristics, microbial composition, metabolome, and ruminal degradation properties of mulberry silage
Source: Research Square preprint supplement (doi:10.21203/rs.3.rs-7345171/v1), 2025-09-11
Supplement: Supplementary file 2 [file f09b8e6c89f26ec982eb6477.xlsx]

## Sheet: FL VS FC
No.	M/Z	Mode	Metabolite	FDR	VIP_pred_OPLS-DA	VIP_PLS-DA	FC(FL/FC)	Log2FC(FL/FC)	P_value	Regulate	KEGG Pathway ID	KEGG Pathway Description
1	386.124	pos	Averufin	2.404E-8	3.3814	3.3716	0.0316	-4.9859	2.686E-10	down	-	-
2	225.124	pos	Gamma-Glutamylleucine	3.729E-8	3.2958	3.2864	0.0356	-4.8126	4.717E-10	down	-	-
3	337.035	neg	2-(3,4-Dihydroxyphenyl)-5,6-dihydroxy-7-methoxy-4H-1-benzopyran-4-one	5.074E-9	3.2253	3.213	0.0591	-4.0804	3.354E-11	down	-	-
4	272.173	neg	Valyl-Arginine	1.895E-11	3.2177	3.2061	30.6126	4.9361	7.76E-15	up	-	-
5	359.256	pos	MG(0:0/20:3(8Z,11Z,14Z)-O(5,6)/0:0)	1.366E-6	3.1637	3.1565	0.0704	-3.8282	8.458E-8	down	-	-
6	423.187	neg	(-)-2-Difluoromethylornithine	2.126E-8	3.0925	3.0807	4.8477	2.2773	2.313E-10	up	-	-
7	247.043	pos	N-(2-Hydroxy-3,3,3-trifluoropropyl)-2-(2-nitro-1-imidazolyl)acetamide	3.095E-9	3.0708	3.0609	8.2949	3.0522	1.774E-11	up	-	-
8	367.046	neg	Vanilloyl glucose	0.0005154	2.9683	2.9481	0.2046	-2.2893	0.0001947	down	-	-
9	465.103	pos	Quercetin 3-beta-D-glucoside	1.808E-5	2.9372	2.9236	4.999	2.3216	2.747E-6	up	map01100;map01110;map00946;map00944	Metabolic pathways;Biosynthesis of secondary metabolites;Degradation of flavonoids;Flavone and flavonol biosynthesis
10	353.135	neg	Gibberellin A40	3.718E-7	2.9311	2.9157	0.3721	-1.4264	1.253E-8	down	map01110;map00904	Biosynthesis of secondary metabolites;Diterpenoid biosynthesis
11	274.188	pos	Val Arg	6.118E-5	2.8932	2.8803	2.3889	1.2564	1.37E-5	up	-	-
12	183.048	pos	6-[Ethoxy(mercapto)methylidene]-1-cyclohexa-2,4-dienone	8.879E-5	2.8866	2.8669	0.3184	-1.6512	2.199E-5	down	-	-
13	420.192	pos	DV 7751a	1.144E-6	2.8485	2.8428	0.157	-2.6713	6.533E-8	down	-	-
14	487.195	pos	15-Hydroxynorandrostene-3,17-dione glucuronide	0.0002764	2.8402	2.8326	0.2942	-1.7653	9.137E-5	down	map01100;map00040;map04976;map00053;map01240	Metabolic pathways;Pentose and glucuronate interconversions;Bile secretion;Ascorbate and aldarate metabolism;Biosynthesis of cofactors
15	398.145	pos	Trans-p-Feruloyl-beta-D-glucopyranoside	7.391E-5	2.8285	2.8231	0.2383	-2.0693	1.751E-5	down	-	-
16	296.125	pos	P-Hydroxyfelbamate	0.002966	2.8237	2.8035	7.006	2.8086	0.001519	up	map00982	Drug metabolism - cytochrome P450
17	403.104	neg	Plicatic acid	0.0009606	2.7731	2.7629	3.8843	1.9576	0.0004075	up	-	-
18	267.099	neg	Musk ambrette	0.003547	2.7719	2.751	4.9974	2.3212	0.001863	up	-	-
19	611.162	pos	Rutin	8.171E-6	2.7581	2.7485	2.3073	1.2062	9.654E-7	up	map01100;map01110;map00946;map00944	Metabolic pathways;Biosynthesis of secondary metabolites;Degradation of flavonoids;Flavone and flavonol biosynthesis
20	293.124	neg	Prenyl glucoside	1.917E-5	2.7268	2.7228	2.2051	1.1408	2.955E-6	up	-	-
21	309.145	neg	Estriol	2.467E-5	2.7163	2.698	0.4643	-1.107	4.145E-6	down	map01100;map07226;map00140	Metabolic pathways;Progesterone, androgen and estrogen receptor agonists/antagonists;Steroid hormone biosynthesis
22	275.093	neg	(R)-Kawain	0.007527	2.7071	2.7012	0.0219	-5.5146	0.004351	down	-	-
23	226.129	pos	N-alpha-acetyl lysine methyl ester	0.002045	2.6883	2.6851	4.0664	2.0237	0.0009902	up	-	-
24	341.044	neg	Protosappanin B	5.159E-9	2.6698	2.6604	3.301	1.7229	3.44E-11	up	-	-
25	292.13	pos	Ser Trp	0.003045	2.6529	2.6344	4.6626	2.2211	0.001565	up	-	-
26	358.129	neg	Moupinamide	1.67E-6	2.6525	2.6378	0.4697	-1.0902	1.121E-7	down	-	-
27	155.045	neg	N-formimidoyl-glutamic acid	2.712E-14	2.6291	2.6186	0.4464	-1.1637	2.224E-18	down	map01100;map00340	Metabolic pathways;Histidine metabolism
28	607.435	pos	DG(18:3(9Z,12Z,15Z)/14:0/0:0)	0.004988	2.6259	2.6268	0.3268	-1.6136	0.00274	down	map05214;map05167;map04650;map05163;map04750;map05235;map04015;map04014;map04659;map04540;map04010;map04012;map05022;map04370;map04371;map04072;map04071;map04975;map05143;map05012;map05231;map05146;map04919;map05200;map04961;map04745;map04921;map04920;map04923;map04925;map05017;map04625;map04929;map04726;map04725;map04724;map04723;map04722;map05223;map04720;map04666;map05170;map04664;map04658;map…	Glioma;Kaposi sarcoma-associated herpesvirus infection;Natural killer cell mediated cytotoxicity;Human cytomegalovirus infection;Inflammatory mediator regulation of TRP channels;PD-L1 expression and PD-1 checkpoint pathway in cancer;Rap1 signaling pathway;Ras signaling pathway;Th17 cell differentiation;Gap junction;MAPK signaling pathway;ErbB signaling pathway;Pathways of neurodegeneration - mult…
29	647.522	pos	DG(20:5(5Z,8Z,11Z,14Z,17Z)/16:0/0:0)	0.000398	2.599	2.5916	0.4183	-1.2573	0.0001432	down	map05214;map05167;map04650;map05163;map04750;map05235;map04015;map04014;map04659;map04540;map04010;map04012;map05022;map04370;map04371;map04072;map04071;map04975;map05143;map05012;map05231;map05146;map04919;map05200;map04961;map04745;map04921;map04920;map04923;map04925;map05017;map04625;map04929;map04726;map04725;map04724;map04723;map04722;map05223;map04720;map04666;map05170;map04664;map04658;map…	Glioma;Kaposi sarcoma-associated herpesvirus infection;Natural killer cell mediated cytotoxicity;Human cytomegalovirus infection;Inflammatory mediator regulation of TRP channels;PD-L1 expression and PD-1 checkpoint pathway in cancer;Rap1 signaling pathway;Ras signaling pathway;Th17 cell differentiation;Gap junction;MAPK signaling pathway;ErbB signaling pathway;Pathways of neurodegeneration - mult…
30	289.165	pos	L-Prolinamide, 5-oxo-L-prolyl-L-norvalyl-	0.0005405	2.56	2.5579	2.3949	1.2599	0.0002066	up	-	-
31	126.067	pos	5-Methylcytosine	4.438E-7	2.5502	2.5398	2.1589	1.1103	1.654E-8	up	map00240;map01100	Pyrimidine metabolism;Metabolic pathways
32	367.063	neg	N-Formyl-L-aspartate	0.002858	2.5431	2.5479	1.7648	0.8195	0.001456	up	map01100;map00340	Metabolic pathways;Histidine metabolism
33	175.119	pos	L-(+)-Arginine	9.914E-5	2.5293	2.5159	1.8337	0.8748	2.529E-5	up	map01100;map00220;map01110;map02010;map05146;map00998;map00470;map00330;map00331;map01230;map05014;map04974;map00970;map00261;map05142;map05230;map01064;map04150;map05022;map01060	Metabolic pathways;Arginine biosynthesis;Biosynthesis of secondary metabolites;ABC transporters;Amoebiasis;Biosynthesis of various antibiotics;D-Amino acid metabolism;Arginine and proline metabolism;Clavulanic acid biosynthesis;Biosynthesis of amino acids;Amyotrophic lateral sclerosis;Protein digestion and absorption;Aminoacyl-tRNA biosynthesis;Monobactam biosynthesis;Chagas disease;Central carbo…
34	173.008	neg	Cis-Aconitic Acid	8.866E-6	2.4943	2.4861	1.7708	0.8244	1.074E-6	up	map01100;map00630;map01110;map01120;map01210;map01070;map00720;map01065;map00020;map01066;map00660;map01064;map01063;map01062;map01061;map01060	Metabolic pathways;Glyoxylate and dicarboxylate metabolism;Biosynthesis of secondary metabolites;Microbial metabolism in diverse environments;2-Oxocarboxylic acid metabolism;Biosynthesis of plant hormones;Carbon fixation pathways in prokaryotes;Biosynthesis of alkaloids derived from histidine and purine;Citrate cycle (TCA cycle);Biosynthesis of alkaloids derived from terpenoid and polyketide;C5-B…
35	371.135	neg	Loganoside	8.393E-10	2.4914	2.4824	2.2577	1.1748	2.406E-12	up	-	-
36	535.146	pos	1-Hydroxy-3-methoxy-7-primeverosyloxyxanthone	0.001788	2.4912	2.4852	2.407	1.2672	0.0008482	up	-	-
37	245.093	pos	DL-Buthionine sulfoximine	0.0002998	2.4906	2.4815	0.1768	-2.5	0.0001011	down	-	-
38	200.129	neg	Methylisopelletierine	7.85E-5	2.4877	2.4773	0.4826	-1.051	1.888E-5	down	map01110;map00960;map01064	Biosynthesis of secondary metabolites;Tropane, piperidine and pyridine alkaloid biosynthesis;Biosynthesis of alkaloids derived from ornithine, lysine and nicotinic acid
39	443.228	pos	Pteroside A	1.709E-7	2.4733	2.4633	2.1159	1.0813	4.31E-9	up	-	-
40	319.141	pos	Salicin	0.0005281	2.4711	2.4579	2.231	1.1577	0.0002007	up	map00010;map02060;map04742;map01061	Glycolysis / Gluconeogenesis;Phosphotransferase system (PTS);Taste transduction;Biosynthesis of phenylpropanoids
41	465.272	pos	LysoPE(0:0/14:1(9Z))	4.662E-5	2.4688	2.4653	0.4895	-1.0306	9.601E-6	down	-	-
42	377.182	pos	Yohimbine	0.0001714	2.4656	2.4568	3.3719	1.7536	4.983E-5	up	-	-
43	213.066	pos	5-Hydroxyindoleacetylglycine	0.0001046	2.4519	2.4452	0.2417	-2.0489	2.718E-5	down	map00380	Tryptophan metabolism
44	174.149	pos	(2S,4R,5S)-Muscarine	6.844E-6	2.4348	2.4246	0.4802	-1.0584	7.666E-7	down	map07220	Cholinergic and anticholinergic drugs
45	669.146	neg	4''-Methyl-6''-(3,4-dihydroxy-E-cinnamoyl)isoorientin	1.669E-9	2.4279	2.4184	1.9002	0.9262	6.932E-12	up	-	-
46	77.0604	pos	(S)-Propane-1,2-diol	2.571E-9	2.4213	2.4117	0.4847	-1.0448	1.308E-11	down	-	-
47	309.107	neg	Valine-betaxanthin	0.0001744	2.4201	2.4116	2.3872	1.2553	5.118E-5	up	-	-
48	288.203	pos	Ile Arg	0.000373	2.407	2.3985	1.6602	0.7314	0.0001325	up	-	-
49	173.104	neg	2-Amino-4-[carbamimidoyl(methyl)amino]butanoic acid	1.439E-5	2.4036	2.3928	1.9142	0.9368	2.012E-6	up	-	-
50	245.077	pos	Pseudouridine	2.789E-10	2.3989	2.3904	1.9227	0.9432	4.731E-13	up	map00240;map01100	Pyrimidine metabolism;Metabolic pathways
51	517.207	neg	Citronellyl beta-sophoroside	1.129E-6	2.3985	2.3889	1.9235	0.9437	6.422E-8	up	-	-
52	256.082	pos	Nicotinic acid ribonucleoside	1.703E-5	2.3684	2.3583	1.8646	0.8989	2.521E-6	up	map01100;map00760	Metabolic pathways;Nicotinate and nicotinamide metabolism
53	174.088	neg	Citrulline	1.419E-8	2.3629	2.3564	1.8145	0.8595	1.303E-10	up	map01100;map00220;map01110;map01230	Metabolic pathways;Arginine biosynthesis;Biosynthesis of secondary metabolites;Biosynthesis of amino acids
54	290.139	pos	4',7-Dihydroxy-6-methoxyisoflavan	1.19E-5	2.3553	2.35	0.4693	-1.0916	1.556E-6	down	-	-
55	395.315	pos	MG(0:0/19:0/0:0)	4.082E-7	2.353	2.3402	0.5699	-0.8112	1.478E-8	down	-	-
56	613.137	neg	Narciclasine	1.518E-9	2.3492	2.3409	1.9177	0.9393	5.95E-12	up	-	-
57	404.135	pos	Nedocromil	6.391E-5	2.3485	2.3293	0.604	-0.7273	1.445E-5	down	-	-
58	628.47	neg	Cer(d18:2(4E,14Z)/18:1(12Z)-2OH(9,10))	5.388E-6	2.348	2.3343	0.5479	-0.8679	5.528E-7	down	-	-
59	402.119	neg	Gravacridonetriol	8.582E-8	2.3439	2.3368	0.5814	-0.7824	1.566E-9	down	-	-
60	391.105	neg	Alinamin	4.533E-5	2.3357	2.325	1.7471	0.805	9.258E-6	up	-	-
61	320.125	pos	Xenognosin A	0.0006233	2.3325	2.3177	2.3964	1.2608	0.0002446	up	-	-
62	321.146	neg	2-Methoxyestrone	8.255E-5	2.3295	2.3204	0.4344	-1.203	2.008E-5	down	map00140	Steroid hormone biosynthesis
63	567.462	neg	TG(8:0/8:0/i-15:0)	0.0001639	2.3283	2.3232	0.5743	-0.8	4.706E-5	down	map01100;map04979;map00561;map04977;map04975;map04923;map04714;map05417;map04931	Metabolic pathways;Cholesterol metabolism;Glycerolipid metabolism;Vitamin digestion and absorption;Fat digestion and absorption;Regulation of lipolysis in adipocytes;Thermogenesis;Lipid and atherosclerosis;Insulin resistance
64	395.192	neg	(1S,2R,4R,8S)-p-Menthane-2,8,9-triol 9-glucoside	4.571E-7	2.3235	2.3162	1.7682	0.8223	1.727E-8	up	-	-
65	237.04	neg	2H-Pyran-2-one	5.423E-8	2.3225	2.3137	0.5339	-0.9055	8.025E-10	down	-	-
66	301.155	pos	Phenylalanylisoleucine	1.119E-6	2.3118	2.301	2.034	1.0243	6.329E-8	up	-	-
67	155.045	neg	5,5-Dimethylbarbituric acid	3.161E-11	2.3099	2.2998	0.5048	-0.9863	1.89E-14	down	-	-
68	420.224	pos	D-Linalool 3-(6''-malonylglucoside)	2.88E-12	2.3061	2.2974	1.8238	0.8669	6.738E-16	up	-	-
69	256.177	pos	Pirimicarb	9.403E-6	2.3055	2.2978	1.8166	0.8613	1.157E-6	up	-	-
70	369.119	pos	3-O-Feruloylquinic acid	3.312E-5	2.3026	2.2931	1.7652	0.8199	6.138E-6	up	-	-
71	361.14	neg	DL-m-Tyrosine	2.579E-5	2.2963	2.2868	1.8783	0.9094	4.404E-6	up	-	-
72	260.113	pos	Osmaronin	3.993E-8	2.2936	2.2854	0.5335	-0.9064	5.295E-10	down	-	-
73	356.114	pos	Ovalitenone	1.544E-6	2.2929	2.2837	0.5611	-0.8337	1.005E-7	down	-	-
74	621.414	pos	Coriandrinol	0.0002496	2.2898	2.2712	0.4975	-1.0072	8.019E-5	down	-	-
75	596.133	neg	Delphinidin 3-sambubioside	8.011E-9	2.2866	2.2793	1.7074	0.7718	5.858E-11	up	-	-
76	579.154	neg	7-[3-O-(4-Hydroxycinnamoyl)-Beta-D-glucopyranosyloxy]-4',5-Dihydroxyflavanone	0.0003005	2.2849	2.275	2.0584	1.0415	0.0001014	up	-	-
77	216.087	neg	N-[(3s)-2-Oxotetrahydrofuran-3-Yl]butanamide	5.466E-5	2.2799	2.2694	0.5386	-0.8928	1.182E-5	down	-	-
78	287.092	pos	Vestitone	0.0006651	2.2754	2.2654	2.2605	1.1767	0.0002639	up	map00943;map01100;map01110	Isoflavonoid biosynthesis;Metabolic pathways;Biosynthesis of secondary metabolites
79	175.024	neg	Ascorbic Acid	0.000285	2.2655	2.2524	2.1699	1.1176	9.49E-5	up	map01100;map00480;map01110;map01120;map01240;map04977;map00053;map02060;map04066	Metabolic pathways;Glutathione metabolism;Biosynthesis of secondary metabolites;Microbial metabolism in diverse environments;Biosynthesis of cofactors;Vitamin digestion and absorption;Ascorbate and aldarate metabolism;Phosphotransferase system (PTS);HIF-1 signaling pathway
80	403.161	neg	7-Aminomethyl-7-carbaguanine	1.121E-8	2.2645	2.2561	1.7464	0.8044	9.249E-11	up	map01100;map00790	Metabolic pathways;Folate biosynthesis
81	452.251	pos	PA(8:0/10:0)	2.786E-5	2.2583	2.2491	1.7354	0.7952	4.868E-6	up	map01100;map00564;map01110;map00561;map05212;map05200;map04975;map04024;map05231;map04072;map04912;map04070;map04666	Metabolic pathways;Glycerophospholipid metabolism;Biosynthesis of secondary metabolites;Glycerolipid metabolism;Pancreatic cancer;Pathways in cancer;Fat digestion and absorption;cAMP signaling pathway;Choline metabolism in cancer;Phospholipase D signaling pathway;GnRH signaling pathway;Phosphatidylinositol signaling system;Fc gamma R-mediated phagocytosis
82	318.134	pos	Melilotocarpan A	3.993E-8	2.2532	2.241	0.5216	-0.939	5.308E-10	down	-	-
83	401.145	neg	Benzyl O-[arabinofuranosyl-(1->6)-glucoside]	2.317E-5	2.253	2.2442	1.7248	0.7864	3.829E-6	up	-	-
84	469.133	pos	Lucuminic acid	0.0003151	2.2504	2.2392	1.7016	0.7669	0.0001078	up	-	-
85	440.187	neg	(R)-pantoate	0.001105	2.2475	2.2392	0.5049	-0.9858	0.0004808	down	map01100;map01110;map00770;map01240	Metabolic pathways;Biosynthesis of secondary metabolites;Pantothenate and CoA biosynthesis;Biosynthesis of cofactors
86	323.161	neg	19-Hydroxyandrost-4-ene-3,17-dione	2.631E-6	2.2429	2.2326	0.6044	-0.7264	2.11E-7	down	map01100;map00140	Metabolic pathways;Steroid hormone biosynthesis
87	479.25	neg	D-Alanyl-D-alanine	2.251E-9	2.2399	2.232	1.7004	0.7659	1.053E-11	up	map01100;map00470;map00550;map01502	Metabolic pathways;D-Amino acid metabolism;Peptidoglycan biosynthesis;Vancomycin resistance
88	302.135	neg	5-Fluoro-8-hydroxy-2-(dipropylamino)tetralin	5.569E-7	2.236	2.2241	1.8367	0.8771	2.336E-8	up	-	-
89	370.296	pos	MG(18:3(9Z,12Z,15Z)/0:0/0:0)	1.904E-9	2.2354	2.2278	0.5964	-0.7455	8.351E-12	down	-	-
90	409.184	pos	Alpha-Peroxyachifolide	8.346E-8	2.2354	2.2268	1.6786	0.7472	1.489E-9	up	-	-
91	256.103	pos	2-Keto-3-Deoxy-D-Mannooctanoic Acid	4.054E-6	2.2316	2.2205	1.7829	0.8342	3.811E-7	up	-	-
92	627.461	pos	DG(14:0/20:4(5Z,8Z,11Z,14Z)-OH(19S)/0:0)	0.003332	2.2194	2.2199	0.5585	-0.8404	0.001735	down	-	-
93	443.192	neg	Cynaroside A	0.0002752	2.2192	2.2069	1.645	0.718	9.089E-5	up	-	-
94	539.188	neg	Cyanazine	9.914E-8	2.2142	2.2064	1.6332	0.7077	1.948E-9	up	-	-
95	633.172	neg	Lanceolatin C	0.03156	2.2044	2.2684	2.4773	1.3088	0.02144	up	-	-
96	323.172	pos	Trimethoprim	6.531E-5	2.195	2.1893	1.8604	0.8956	1.492E-5	up	-	-
97	399.13	neg	Methyl helianthenoate F glucoside	6.016E-8	2.1928	2.1859	1.818	0.8623	9.219E-10	up	-	-
98	312.131	pos	N,n-Dimethylguanosine	5.074E-8	2.1916	2.1832	1.6961	0.7622	7.361E-10	up	-	-
99	286.188	neg	Leucyl-Arginine	1.047E-9	2.1904	2.1828	1.5555	0.6374	3.799E-12	up	-	-
100	386.327	pos	Solutol HS 15	4.793E-5	2.1892	2.1787	0.613	-0.7061	9.967E-6	down	-	-
101	431.192	neg	Corchoionol C 9-glucoside	0.001112	2.1889	2.186	1.5673	0.6483	0.0004841	up	-	-
102	205.119	pos	2-Keto-6-acetamidocaproate	0.0003755	2.1862	2.1724	1.7617	0.8169	0.0001335	up	map01100;map00310	Metabolic pathways;Lysine degradation
103	249.046	pos	Alanyl-Aspartic acid	0.0002499	2.1822	2.1784	1.7953	0.8442	8.031E-5	up	-	-
104	361.199	pos	Tryptophyl-Arginine	0.0001128	2.1743	2.1632	1.7427	0.8013	2.981E-5	up	-	-
105	455.098	neg	4'-Hydroxyfenoprofen glucuronide	1.737E-5	2.1697	2.1614	0.5581	-0.8414	2.594E-6	down	-	-
106	429.101	pos	Glucobrassicanapin	1.235E-10	2.1696	2.1625	1.8308	0.8725	1.156E-13	up	-	-
107	263.077	neg	Xylobiose	3.64E-5	2.163	2.1534	1.6868	0.7543	6.936E-6	up	map02010	ABC transporters
108	239.103	pos	N-Hydroxy-L-tyrosine	0.003406	2.1616	2.1423	1.968	0.9767	0.001781	up	map00460;map01100;map01110	Cyanoamino acid metabolism;Metabolic pathways;Biosynthesis of secondary metabolites
109	302.136	neg	Cycloheximide	3.069E-5	2.16	2.153	1.863	0.8977	5.533E-6	up	-	-
110	573.452	neg	DG(16:1(9Z)/15:0/0:0)	0.01146	2.154	2.1586	0.5076	-0.9782	0.006974	down	map05214;map05167;map04650;map05163;map04750;map05235;map04015;map04014;map04659;map04540;map04010;map04012;map05022;map04370;map04371;map04072;map04071;map04975;map05143;map05012;map05231;map05146;map04919;map05200;map04961;map04745;map04921;map04920;map04923;map04925;map05017;map04625;map04929;map04726;map04725;map04724;map04723;map04722;map05223;map04720;map04666;map05170;map04664;map04658;map…	Glioma;Kaposi sarcoma-associated herpesvirus infection;Natural killer cell mediated cytotoxicity;Human cytomegalovirus infection;Inflammatory mediator regulation of TRP channels;PD-L1 expression and PD-1 checkpoint pathway in cancer;Rap1 signaling pathway;Ras signaling pathway;Th17 cell differentiation;Gap junction;MAPK signaling pathway;ErbB signaling pathway;Pathways of neurodegeneration - mult…
111	259.155	neg	(x)-2-Heptanol glucoside	2.726E-5	2.1489	2.1437	0.6455	-0.6316	4.736E-6	down	-	-
112	323.114	neg	Histidylphenylalanine	1.955E-6	2.1487	2.1436	0.5951	-0.7489	1.399E-7	down	-	-
113	501.174	pos	Ethyl 4-(3,4-dimethoxyphenyl)-6,7-dimethoxy-2-(1H-1,2,4-triazol-1-ylmethyl)-3-quinolinecarboxylate	3.312E-6	2.1476	2.1405	1.592	0.6709	2.899E-7	up	-	-
114	202.072	neg	Paramethadione	5.086E-6	2.1457	2.1334	0.5822	-0.7805	5.136E-7	down	-	-
115	270.193	pos	Isoleucyl-Arginine	1.989E-6	2.1415	2.1338	1.629	0.704	1.435E-7	up	-	-
116	290.125	pos	2-(4-Phenylphenyl)acetohydrazide	6.889E-6	2.1357	2.1279	0.6261	-0.6755	7.733E-7	down	-	-
117	282.12	pos	1-Methyladenosine	5.44E-6	2.1277	2.1184	1.6881	0.7554	5.604E-7	up	-	-
118	285.077	neg	Naringenin 5-Methyl Ether	9.856E-6	2.1211	2.1071	0.609	-0.7154	1.23E-6	down	-	-
119	474.286	neg	(5Z)-7-[(1R,2R,5S)-5-Hydroxy-2-[(1E,3S,5Z)-3-hydroxyocta-1,5-dien-1-yl]-3-oxocyclopentyl]hept-5-enoylcarnitine	0.0002876	2.1201	2.1118	0.6091	-0.7152	9.594E-5	down	-	-
120	649.466	pos	DG(i-13:0/PGF1alpha/0:0)	0.006124	2.117	2.0941	0.6503	-0.6208	0.003453	down	-	-
121	399.166	neg	Propofol glucuronide	7.326E-11	2.1163	2.1078	1.636	0.7101	6.428E-14	up	-	-
122	496.204	pos	Kelampayoside A	4.698E-5	2.1158	2.1056	1.6426	0.716	9.72E-6	up	-	-
123	370.129	pos	S-Hydroxymethylglutathione	9.702E-6	2.1114	2.102	0.6051	-0.7247	1.203E-6	down	map00680;map01100;map01120	Methane metabolism;Metabolic pathways;Microbial metabolism in diverse environments
124	535.109	pos	Luteolin 7-malonylglucoside	4.126E-5	2.1075	2.099	1.5892	0.6683	8.172E-6	up	-	-
125	374.218	pos	Xanthoplanine	0.001588	2.1074	2.1087	1.748	0.8057	0.0007378	up	-	-
126	369.225	pos	11-Dehydro-thromboxane B2	3.244E-5	2.1052	2.0964	1.5843	0.6638	5.973E-6	up	map00590;map01100;map04726	Arachidonic acid metabolism;Metabolic pathways;Serotonergic synapse
127	250.094	pos	Vidarabine	0.003819	2.1034	2.1079	1.9021	0.9276	0.002025	up	-	-
128	262.072	neg	2-(Quinolin-8-yloxy)propanoic acid	3.157E-7	2.1025	2.0932	0.5795	-0.787	1.003E-8	down	-	-
129	530.13	pos	(2S,3S,4S,5R)-6-[[2-(3,4-Dihydroxyphenyl)-5,7-dihydroxy-3,4-dihydro-2H-chromen-3-yl]oxy]-3,4,5-trihydroxyoxane-2-carboxylic acid	6.576E-8	2.1013	2.0931	1.5904	0.6694	1.054E-9	up	-	-
130	330.14	pos	Imidazolelactic acid	2.867E-9	2.101	2.0939	1.6488	0.7214	1.559E-11	up	-	-
131	175.119	pos	Isobutylidene	6.863E-5	2.096	2.0986	1.5195	0.6036	1.593E-5	up	-	-
132	316.049	pos	Cis-Ferulic acid 4-sulfate	3.294E-6	2.0945	2.0865	1.6154	0.6919	2.877E-7	up	-	-
133	332.099	neg	N-Acetyl-7-O-acetylneuraminic acid	3.11E-6	2.0928	2.0875	0.6087	-0.7163	2.687E-7	down	-	-
134	227.082	pos	3'-DEOXY-3'-FLUOROTHYMIDINE	0.01146	2.0923	2.1064	2.558	1.355	0.006973	up	-	-
135	661.502	pos	DG(17:0/PGD2/0:0)	0.00066	2.0911	2.0964	0.6642	-0.5904	0.0002614	down	-	-
136	629.38	pos	DG(i-12:0/PGJ2/0:0)	1.033E-5	2.0908	2.0852	1.5258	0.6096	1.301E-6	up	-	-
137	387.069	neg	Prodiamine	2.228E-5	2.0891	2.0805	1.6424	0.7158	3.638E-6	up	-	-
138	303.087	neg	Tropolone	0.001736	2.0865	2.0629	0.5428	-0.8816	0.0008186	down	map07216	Catecholamine transferase inhibitors
139	529.099	neg	6-O-Galloylsucrose	5.86E-6	2.0856	2.0751	0.6105	-0.7119	6.21E-7	down	-	-
140	339.051	neg	(2E)-2-{6-[(E)-2-Carboxyethenyl]-2,3-dihydroxyphenyl}-3-(3,4-dihydroxyphenyl)prop-2-enoic acid	6.833E-7	2.0834	2.0723	0.6198	-0.6902	3.19E-8	down	-	-
141	363.108	neg	2',6'-Dihydroxy-4'-methoxyacetophenone	5.486E-10	2.082	2.0728	0.6561	-0.6081	1.271E-12	down	-	-
142	307.13	neg	Prolylphenylalanine	1.721E-5	2.0807	2.0782	0.559	-0.8392	2.557E-6	down	-	-
143	323.295	pos	Isopropyl linoleate	0.006389	2.0793	2.0664	0.5669	-0.8189	0.003621	down	-	-
144	321.207	neg	(S)-[8]-Gingerol	0.0002457	2.0777	2.0761	1.581	0.6609	7.846E-5	up	-	-
145	617.476	pos	DG(15:0/0:0/PGF2alpha)	7.964E-5	2.0769	2.0688	0.6515	-0.6181	1.923E-5	down	-	-
146	315.124	neg	Tocopheronic acid	0.0001075	2.0732	2.062	1.6464	0.7193	2.813E-5	up	-	-
147	579.208	neg	(+)-Syringaresinol O-beta-D-glucoside	9.718E-8	2.0705	2.0603	1.5807	0.6606	1.889E-9	up	-	-
148	529.098	neg	4',8-Dimethylgossypetin 3-glucoside	1.753E-5	2.0677	2.0586	0.643	-0.6371	2.625E-6	down	-	-
149	210.077	neg	Norsalsolinol	9.494E-8	2.0658	2.0583	0.5788	-0.7888	1.805E-9	down	-	-
150	288.203	pos	Leu Arg	0.004984	2.0657	2.0808	1.696	0.7621	0.002738	up	-	-
151	130.603	pos	Lysylisoleucine	0.0001855	2.0625	2.0547	1.5904	0.6694	5.534E-5	up	-	-
152	384.188	pos	Cis-zeatin riboside	1.179E-5	2.0606	2.0493	1.6455	0.7185	1.537E-6	up	map01110;map00908	Biosynthesis of secondary metabolites;Zeatin biosynthesis
153	327.051	neg	Aflatoxin G	5.587E-7	2.058	2.0492	0.593	-0.7539	2.358E-8	down	map01100;map01110;map00254	Metabolic pathways;Biosynthesis of secondary metabolites;Aflatoxin biosynthesis
154	186.055	pos	Benzofuran ketone	0.0002647	2.0574	2.0509	1.7227	0.7846	8.632E-5	up	-	-
155	273.16	pos	(2R)-2-[[(2S,3R)-3-Amino-2-hydroxy-4-phenyl-butanoyl]amino]-4-methyl-pentanoic acid	5.167E-5	2.0562	2.0507	1.765	0.8197	1.099E-5	up	-	-
156	373.256	pos	Val Val Arg	1.567E-8	2.0471	2.0384	1.6423	0.7157	1.531E-10	up	-	-
157	456.13	pos	4-Hydroxy-5-[3-(sulfooxy)phenyl]pentanoylcarnitine	0.001127	2.044	2.037	0.5834	-0.7774	0.0004915	down	-	-
158	240.102	pos	N-Hydroxy phip	5.327E-6	2.0429	2.0338	0.602	-0.7321	5.459E-7	down	map05204	Chemical carcinogenesis - DNA adducts
159	357.061	pos	Grevilline D	2.056E-5	2.041	2.0355	0.633	-0.6598	3.253E-6	down	-	-
160	463.302	neg	2-amino-5-(amino-dimethylamino-methylidene)amino-pentanoic acid	2.229E-7	2.0408	2.0345	0.6545	-0.6114	6.125E-9	down	-	-
161	679.512	pos	DG(PGE2/0:0/i-17:0)	5.984E-7	2.0385	2.0282	0.6664	-0.5856	2.608E-8	down	-	-
162	479.062	neg	Glucoberteroin	3.372E-8	2.0382	2.0302	0.6303	-0.6659	4.115E-10	down	map01210;map01110;map00966	2-Oxocarboxylic acid metabolism;Biosynthesis of secondary metabolites;Glucosinolate biosynthesis
163	246.146	pos	Asn Leu	0.0003459	2.038	2.0223	1.6045	0.6821	0.0001209	up	-	-
164	194.104	pos	Hydrazinonicotinamide	2.099E-6	2.0366	2.0297	0.588	-0.7662	1.552E-7	down	-	-
165	326.161	pos	Paclobutrazol	9.57E-5	2.0356	2.0356	0.5576	-0.8427	2.417E-5	down	-	-
166	471.145	neg	Chitobiose	0.0392	2.0322	2.034	19.1316	4.2579	0.02724	up	map01100;map00520;map02060;map02010	Metabolic pathways;Amino sugar and nucleotide sugar metabolism;Phosphotransferase system (PTS);ABC transporters
167	433.208	neg	Alanyl-Gamma-glutamate	2.126E-8	2.0313	2.0232	1.5712	0.6519	2.313E-10	up	-	-
168	294.182	pos	Gingerol	1.874E-6	2.0309	2.0197	1.6113	0.6883	1.324E-7	up	map01110;map00945	Biosynthesis of secondary metabolites;Stilbenoid, diarylheptanoid and gingerol biosynthesis
169	337.092	pos	Dattelic acid	0.0008223	2.0303	2.0282	1.544	0.6267	0.0003397	up	map01100;map00941;map00940;map01110;map00945	Metabolic pathways;Flavonoid biosynthesis;Phenylpropanoid biosynthesis;Biosynthesis of secondary metabolites;Stilbenoid, diarylheptanoid and gingerol biosynthesis
170	308.14	pos	Miroprofen	1.642E-6	2.0238	2.0168	0.5042	-0.9878	1.095E-7	down	-	-
171	471.151	pos	Loquatoside	8.681E-5	2.0211	2.0113	1.5348	0.618	2.14E-5	up	-	-
172	266.089	neg	8-Oxo-2'-deoxyadenosine	0.003957	2.0206	2.0132	1.7601	0.8156	0.002107	up	-	-
173	461.167	neg	Sayaendoside	0.007528	2.0182	2.0162	1.5172	0.6014	0.004352	up	-	-
174	215.067	neg	Gamma-Glutamylserine	2.013E-9	2.0176	2.0095	1.5364	0.6195	9.065E-12	up	-	-
175	341.135	pos	Glutaminylarginine	1.896E-5	2.0164	2.0082	0.63	-0.6666	2.912E-6	down	-	-
176	329.15	pos	Phe Tyr	0.0009886	2.0149	2.0068	1.6825	0.7506	0.0004224	up	-	-
177	246.145	pos	Gly Gly Leu	4.037E-5	2.0147	2.0081	1.5754	0.6557	7.941E-6	up	-	-
178	367.151	neg	Gibberellin A44	0.02558	2.0134	1.9954	0.5977	-0.7425	0.017	down	-	-
179	429.21	pos	(10S,11R)-Pterosin C 4-glucoside	4.782E-7	2.0112	2.0037	1.57	0.6508	1.855E-8	up	-	-
180	273.16	pos	Maoto	0.0002395	2.0105	2.0058	1.6187	0.6948	7.593E-5	up	-	-
181	237.088	neg	Glycyl-L-Tyrosine	0.001032	2.0076	1.991	1.703	0.7681	0.0004437	up	-	-
182	150.041	neg	2,6-diamino-4-hydroxy-5-formamidopyrimidine	1.946E-5	2.0063	1.9979	1.6554	0.7272	3.026E-6	up	-	-
183	332.146	neg	Arginylhistidine	2.4E-8	2.0034	1.9933	1.6085	0.6857	2.667E-10	up	-	-
184	202.072	neg	1-Acetylproline	2.202E-5	1.9946	1.9874	0.6503	-0.6209	3.58E-6	down	-	-
185	479.249	neg	13-oxo-7-[3,4,5-Trihydroxy-6-(methoxymethyl)oxan-2-yl]oxytetradecanoic Acid	7.819E-8	1.9865	1.9805	1.5293	0.6129	1.356E-9	up	-	-
186	334.188	pos	Timolol	2.626E-5	1.985	1.9793	1.6238	0.6993	4.515E-6	up	-	-
187	671.162	pos	2-(2-Hydroxyethoxy)-6-(2H-tetrazol-5-yl)xanthen-9-one	1.137E-5	1.9841	1.9764	1.5182	0.6024	1.463E-6	up	-	-
188	581.224	neg	Quassimarin	1.788E-6	1.984	1.9743	1.5479	0.6303	1.244E-7	up	-	-
189	267.108	neg	Histidylhydroxyproline	2.84E-7	1.982	1.973	0.6184	-0.6933	8.322E-9	down	-	-
190	361.172	pos	Ile Asn Asp	0.0001447	1.9812	1.9727	1.5466	0.6291	4.062E-5	up	-	-
191	378.214	pos	Arphamenine B	5.771E-5	1.98	1.9751	0.6554	-0.6097	1.273E-5	down	-	-
192	308.15	neg	3,4-dimethylideneheptanedioylcarnitine	8.191E-5	1.9764	1.9676	0.6176	-0.6952	1.989E-5	down	-	-
193	517.135	pos	3'',4''-Diacetylcosmosiin	0.000216	1.9755	1.9672	1.518	0.6021	6.672E-5	up	-	-
194	517.135	pos	2'',3''-Diacetylcosmosiin	1.78E-6	1.9746	1.9671	1.5351	0.6183	1.233E-7	up	-	-
195	334.06	pos	3-Hydroxycinnamoylglycine sulfate	1.686E-7	1.974	1.9692	1.52	0.6041	4.203E-9	up	-	-
196	252.088	neg	Phenylpropionylglycine	3.31E-7	1.974	1.9679	0.6313	-0.6637	1.063E-8	down	-	-
197	359.241	pos	Ala Ile Arg	1.567E-8	1.9726	1.9644	1.5026	0.5875	1.526E-10	up	-	-
198	394.332	neg	N-Oleoyl Leucine	8.208E-8	1.9693	1.9598	0.652	-0.617	1.45E-9	down	-	-
199	481.135	neg	Methyl salicylate O-[rhamnosyl-(1->6)-glucoside]	5.486E-10	1.9681	1.9617	1.5172	0.6014	1.233E-12	up	-	-
200	316.104	neg	Zaprinast	1.676E-8	1.9673	1.9596	0.6521	-0.6168	1.667E-10	down	-	-
201	254.125	pos	2-Amino-9-[4-hydroxy-2-(hydroxymethyl)butyl]-3H-purin-6-one	1.699E-6	1.966	1.9561	0.6557	-0.6089	1.148E-7	down	-	-
202	517.136	pos	3',5,6-Trihydroxy-3,4',7,8-tetramethoxyflavone 3-glucoside	0.0001926	1.9631	1.9583	1.5011	0.586	5.792E-5	up	-	-
203	276.135	pos	Phenylalanyl-Gamma-glutamate	8.863E-5	1.9622	1.9467	1.5955	0.674	2.194E-5	up	-	-
204	293.186	pos	Baptifoline	0.0001241	1.9596	1.9497	1.5528	0.6349	3.356E-5	up	-	-
205	401.033	neg	(+)-Chebulic acid	0.00191	1.9571	1.9433	1.5584	0.64	0.0009146	up	-	-
206	399.13	neg	Methyl (R)-8-Hydroxy-9-decene-4,6-diynoate glucoside	4.777E-8	1.9476	1.941	1.5104	0.5949	6.665E-10	up	-	-
207	169.991	neg	Lanthionine ketimine	2.165E-10	1.9474	1.9383	0.6429	-0.6374	3.085E-13	down	-	-
208	451.105	neg	(-)-Epigallocatechin 3-p-coumaroate	0.0008471	1.9467	1.9403	1.5991	0.6773	0.0003518	up	-	-
209	381.119	neg	Berberine	2.165E-10	1.9449	1.9372	1.5352	0.6184	3.419E-13	up	map00950;map01110;map01063;map04152	Isoquinoline alkaloid biosynthesis;Biosynthesis of secondary metabolites;Biosynthesis of alkaloids derived from shikimate pathway;AMPK signaling pathway
210	112.088	pos	3-Pyridinamine	0.0002552	1.9447	1.9455	0.6402	-0.6434	8.257E-5	down	-	-
211	245.081	pos	3,3',4,5'-Tetrahydroxy-trans-stilbene	4.246E-6	1.9432	1.9328	1.5897	0.6688	4.06E-7	up	-	-
212	262.119	pos	Imazapyr	0.0007361	1.9398	1.9282	1.5773	0.6575	0.0002976	up	-	-
213	257.045	pos	Cordeauxione	0.0006518	1.9358	1.9253	0.6645	-0.5897	0.0002578	down	-	-
214	344.182	neg	4-Amino-2-methylenebutanoic acid	3.291E-8	1.9325	1.9228	1.5481	0.6305	3.947E-10	up	-	-
215	253.071	pos	Buntansin A	5.741E-6	1.9303	1.9196	0.6114	-0.7098	6.034E-7	down	-	-
216	526.084	neg	Birabresib	2.202E-6	1.9295	1.9196	1.5006	0.5855	1.667E-7	up	-	-
217	231.066	pos	2,4,6-Trihydroxybenzophenone	9.835E-5	1.929	1.9189	1.6101	0.6871	2.501E-5	up	-	-
218	241.029	neg	2-(3-Mercaptopropyl)pentanedioic acid	6.849E-6	1.9287	1.9178	0.6149	-0.7016	7.676E-7	down	-	-
219	552.172	pos	Gluten exorphin B4	9.048E-6	1.926	1.9178	1.5031	0.588	1.103E-6	up	-	-
220	280.13	pos	Asn Phe	0.001397	1.9225	1.9073	1.5801	0.66	0.0006359	up	-	-
221	335.259	pos	17-Epimethyltestosterone	4.362E-5	1.9184	1.9109	1.5678	0.6487	8.815E-6	up	-	-
222	504.172	pos	Aminopterin	0.02735	1.9173	1.9648	1.9141	0.9366	0.01833	up	-	-
223	500.12	pos	4-(2-Nitroethyl)phenyl primeveroside	0.000505	1.9123	1.9131	1.7124	0.776	0.0001899	up	-	-
224	294.135	neg	Acetophenone, 4'-hydroxy-3'-methoxy-2-(2-piperidyl)-	9.755E-6	1.9057	1.8939	0.6388	-0.6466	1.211E-6	down	-	-
225	262.14	pos	Ser Val Gly	8.801E-7	1.9046	1.8945	1.544	0.6267	4.474E-8	up	-	-
226	523.341	pos	Milbemycin beta2	0.007921	1.9038	1.8965	0.6634	-0.5921	0.004617	down	-	-
227	134.036	neg	(2E)-4-hydroxy-5-methyl-2-propylidene-3(2H)-furanone	1.587E-6	1.8926	1.885	1.5711	0.6518	1.043E-7	up	-	-
228	353.03	neg	Gomphidic acid	8.346E-5	1.892	1.8877	0.648	-0.6259	2.033E-5	down	-	-
229	401.088	neg	Bisdethiobis(methylthio)gliotoxin	5.266E-5	1.8903	1.892	0.6606	-0.5981	1.125E-5	down	-	-
230	341.066	pos	Limocitrol	1.401E-8	1.8855	1.8802	0.6572	-0.6056	1.27E-10	down	-	-
231	252.088	neg	4-Aminophenylmannoside	0.002581	1.883	1.866	0.6588	-0.6021	0.001295	down	-	-
232	281.064	pos	Triflusal	0.006263	1.8826	1.8918	0.6041	-0.727	0.003542	down	-	-
233	381.119	neg	Amidoxime	0.006245	1.8822	1.8921	1.5716	0.6522	0.00353	up	-	-
234	260.197	pos	Leucyl-Lysine	5.41E-6	1.8794	1.8691	1.6092	0.6863	5.56E-7	up	-	-
235	295.061	pos	3',4'-Di-O-methylquercetin	0.0004599	1.8792	1.8726	0.6577	-0.6046	0.0001697	down	-	-
236	250.108	neg	Endralazine	0.000501	1.8788	1.8744	0.6129	-0.7062	0.0001881	down	-	-
237	287.023	neg	5'-(3',4'-Dihydroxyphenyl)-gamma-valerolactone sulfate	1.642E-6	1.8766	1.8678	0.666	-0.5865	1.096E-7	down	-	-
238	301.152	neg	Neuromedin B (1-3)	0.000159	1.8751	1.864	1.5468	0.6293	4.536E-5	up	-	-
239	377.181	neg	Lysyltryptophan	6.876E-7	1.8728	1.8639	1.5101	0.5946	3.225E-8	up	-	-
240	246.145	pos	Gly Gly Ile	1.766E-5	1.8728	1.8599	1.5469	0.6294	2.652E-6	up	-	-
241	285.019	neg	2-(5'-methylthio)pentylmalate	2.738E-8	1.8667	1.858	0.6558	-0.6087	3.155E-10	down	map01210;map00966	2-Oxocarboxylic acid metabolism;Glucosinolate biosynthesis
242	401.182	neg	Methyl 7-epi-12-hydroxyjasmonate glucoside	5.044E-7	1.8646	1.8594	1.5006	0.5856	2.022E-8	up	-	-
243	380.28	neg	Pentadeca-5,12-dienoylcarnitine	0.00191	1.8618	1.8508	0.664	-0.5907	0.0009148	down	-	-
244	172.024	neg	Isosorbide Mononitrate	9.424E-5	1.8591	1.848	0.6055	-0.7237	2.369E-5	down	-	-
245	317.139	pos	Combretastatin A4	0.0004035	1.8588	1.8537	1.5124	0.5968	0.0001456	up	-	-
246	188.107	pos	6,7-Dimethoxy-1-Methyl-3,4-Dihydroisoquinoline	1.172E-5	1.8544	1.8518	0.6228	-0.6832	1.522E-6	down	-	-
247	626.453	neg	Squalamine	0.0001042	1.8514	1.8366	0.6572	-0.6056	2.701E-5	down	-	-
248	325.071	pos	Rosmarinate	3.337E-6	1.8501	1.8412	1.5103	0.5948	2.926E-7	up	map01100;map00350	Metabolic pathways;Tyrosine metabolism
249	168.024	pos	(Phenylthio)acetic acid	2.276E-5	1.8462	1.8386	0.6517	-0.6177	3.736E-6	down	-	-
250	123.048	pos	Thiodiglycol	0.009262	1.8286	1.8327	0.5951	-0.7488	0.005502	down	-	-
251	351.106	pos	Dihydromelilotoside	1.486E-6	1.8248	1.8176	1.5123	0.5968	9.483E-8	up	-	-
252	222.149	pos	7-(2-aminophenyl)heptanoic acid	0.0001128	1.8246	1.8164	0.6504	-0.6206	2.98E-5	down	-	-
253	309.087	pos	Indoxyl glucuronide	0.008353	1.8084	1.8077	0.6258	-0.6763	0.004906	down	-	-
254	492.13	neg	Norfluoxetine glucuronide	7.859E-6	1.8036	1.7945	1.508	0.5926	9.222E-7	up	-	-
255	382.187	pos	4-Deacetylneosolaniol	0.005422	1.7975	1.7853	0.6146	-0.7022	0.00301	down	map00909	Sesquiterpenoid and triterpenoid biosynthesis
256	418.078	neg	N6-Succinyl Adenosine	0.04268	1.7943	1.7902	0.4917	-1.0242	0.02992	down	-	-
257	454.114	neg	Glycine, L-gamma-glutamyl-2-(1-methyl-4-(nitrosothio)-4-piperidinyl)glycyl-	0.008087	1.7772	1.7693	0.5851	-0.7733	0.004728	down	-	-
258	244.082	pos	Isochorismate	0.0002463	1.776	1.7685	0.6621	-0.5948	7.871E-5	down	map01100;map01110;map01240;map00130;map01053;map01070;map01061	Metabolic pathways;Biosynthesis of secondary metabolites;Biosynthesis of cofactors;Ubiquinone and other terpenoid-quinone biosynthesis;Biosynthesis of siderophore group nonribosomal peptides;Biosynthesis of plant hormones;Biosynthesis of phenylpropanoids
259	418.332	pos	Isolithocholic acid	0.0109	1.7656	1.7625	0.6582	-0.6033	0.006595	down	map00121	Secondary bile acid biosynthesis
260	312.108	pos	Dopamine glucuronide	0.01313	1.756	1.7425	0.6144	-0.7028	0.008092	down	-	-
261	222.149	pos	4-Hydroxy-3-(3-Methyl-2-butenyl)acetophenone	0.0001136	1.7552	1.7466	0.6493	-0.623	3.005E-5	down	-	-
262	208.083	pos	Aciclovir	0.005098	1.7419	1.7483	0.6596	-0.6004	0.002808	down	map04976	Bile secretion
263	305.066	pos	7-Deaza-2'-deoxyguanosine	0.006978	1.7244	1.7022	1.5428	0.6256	0.003995	up	-	-
264	399.072	neg	10-Hydroxycamptothecin	0.01039	1.7136	1.7135	0.6504	-0.6205	0.00625	down	-	-
265	258.08	pos	3-[(3,4-dimethylphenyl)sulfonylamino]propanoic acid	0.001813	1.7066	1.7108	0.6645	-0.5896	0.0008614	down	-	-
266	611.162	pos	Delphinidin 3-rutinoside	0.008055	1.7021	1.731	1.6127	0.6895	0.004705	up	map00942	Anthocyanin biosynthesis
267	344.255	pos	3-Dehydrosphinganine	0.00727	1.6641	1.6886	1.5214	0.6054	0.004185	up	map00600;map01100	Sphingolipid metabolism;Metabolic pathways
268	243.066	neg	2-Hydroxybenzaldehyde	0.01252	1.6588	1.6699	1.5673	0.6483	0.007688	up	map00626;map01100;map01120;map01061;map01220	Naphthalene degradation;Metabolic pathways;Microbial metabolism in diverse environments;Biosynthesis of phenylpropanoids;Degradation of aromatic compounds
269	340.155	pos	Rutacridone	0.02893	1.6327	1.6193	0.4677	-1.0963	0.01949	down	map00996;map01110;map01063	Biosynthesis of various alkaloids;Biosynthesis of secondary metabolites;Biosynthesis of alkaloids derived from shikimate pathway
270	281.15	pos	Boc-D-FMK	0.03936	1.5253	1.5101	0.6192	-0.6916	0.02737	down	-	-
271	196.037	neg	5-Acetamidovalerate	0.0456	1.4685	1.4958	0.6581	-0.6036	0.03215	down	map01100;map00310	Metabolic pathways;Lysine degradation
272	245.093	pos	BUTHIONINE SULFOXIMINE	0.04427	1.2901	1.3754	0.3606	-1.4714	0.03115	down	-	-
273	255.041	neg	1,5-Naphthalene diisocyanate	0.04396	1.2215	1.2357	0.6319	-0.6623	0.0309	down	-	-

## Sheet: FO VS FC
No.	M/Z	Mode	Metabolite	FDR	VIP_pred_OPLS-DA	VIP_PLS-DA	FC(FO/FC)	Log2FC(FO/FC)	P_value	Regulate	KEGG Pathway ID	KEGG Pathway Description
1	465.103	pos	Quercetin 3-beta-D-glucoside	5.679E-5	3.6423	3.592	4.8889	2.2895	1.864E-6	up	map01100;map01110;map00946;map00944	Metabolic pathways;Biosynthesis of secondary metabolites;Degradation of flavonoids;Flavone and flavonol biosynthesis
2	611.162	pos	Rutin	0.0001351	3.5203	3.5038	2.3561	1.2364	8.291E-6	up	map01100;map01110;map00946;map00944	Metabolic pathways;Biosynthesis of secondary metabolites;Degradation of flavonoids;Flavone and flavonol biosynthesis
3	337.035	neg	2-(3,4-Dihydroxyphenyl)-5,6-dihydroxy-7-methoxy-4H-1-benzopyran-4-one	0.005849	3.4802	3.4225	0.2214	-2.1753	0.001919	down	-	-
4	377.182	pos	Yohimbine	0.000234	3.4573	3.4172	3.9172	1.9698	1.959E-5	up	-	-
5	403.104	neg	Plicatic acid	0.001669	3.3577	3.2942	3.681	1.8801	0.0003476	up	-	-
6	437.157	pos	3'-Hydroxy-T2-triol	0.0111	3.3476	3.3072	14.5589	3.8638	0.004336	up	-	-
7	274.188	pos	Val Arg	6.62E-5	3.1255	3.1311	2.075	1.0531	2.48E-6	up	-	-
8	367.063	neg	N-Formyl-L-aspartate	0.00658	3.065	2.9935	1.6923	0.759	0.002231	up	map01100;map00340	Metabolic pathways;Histidine metabolism
9	621.414	pos	Coriandrinol	0.0001477	3.0448	3.0073	0.4545	-1.1378	9.598E-6	down	-	-
10	247.043	pos	N-(2-Hydroxy-3,3,3-trifluoropropyl)-2-(2-nitro-1-imidazolyl)acetamide	0.01339	3.0446	3.0292	6.5177	2.7044	0.005501	up	-	-
11	289.165	pos	L-Prolinamide, 5-oxo-L-prolyl-L-norvalyl-	0.001189	2.9595	2.9222	2.1963	1.1351	0.000221	up	-	-
12	613.137	neg	Narciclasine	1.341E-6	2.906	2.8959	1.8917	0.9197	1.02E-9	up	-	-
13	535.146	pos	1-Hydroxy-3-methoxy-7-primeverosyloxyxanthone	0.003888	2.8994	2.9072	2.2623	1.1778	0.001103	up	-	-
14	293.124	neg	Prenyl glucoside	5.882E-5	2.8872	2.8922	1.9	0.926	1.982E-6	up	-	-
15	647.522	pos	DG(20:5(5Z,8Z,11Z,14Z,17Z)/16:0/0:0)	0.005841	2.8668	2.8491	0.526	-0.9267	0.001915	down	map05214;map05167;map04650;map05163;map04750;map05235;map04015;map04014;map04659;map04540;map04010;map04012;map05022;map04370;map04371;map04072;map04071;map04975;map05143;map05012;map05231;map05146;map04919;map05200;map04961;map04745;map04921;map04920;map04923;map04925;map05017;map04625;map04929;map04726;map04725;map04724;map04723;map04722;map05223;map04720;map04666;map05170;map04664;map04658;map…	Glioma;Kaposi sarcoma-associated herpesvirus infection;Natural killer cell mediated cytotoxicity;Human cytomegalovirus infection;Inflammatory mediator regulation of TRP channels;PD-L1 expression and PD-1 checkpoint pathway in cancer;Rap1 signaling pathway;Ras signaling pathway;Th17 cell differentiation;Gap junction;MAPK signaling pathway;ErbB signaling pathway;Pathways of neurodegeneration - mult…
16	272.129	pos	Norhydromorphone	0.000339	2.8371	2.7559	1.5991	0.6773	3.482E-5	up	-	-
17	275.093	neg	(R)-Kawain	0.02749	2.8316	2.7619	0.2013	-2.3124	0.01349	down	-	-
18	669.146	neg	4''-Methyl-6''-(3,4-dihydroxy-E-cinnamoyl)isoorientin	3.742E-6	2.8244	2.7949	1.7743	0.8272	8.115E-9	up	-	-
19	341.044	neg	Protosappanin B	0.0001696	2.7973	2.8017	2.6659	1.4146	1.183E-5	up	-	-
20	487.195	pos	15-Hydroxynorandrostene-3,17-dione glucuronide	0.01163	2.7803	2.7737	0.5061	-0.9824	0.004604	down	map01100;map00040;map04976;map00053;map01240	Metabolic pathways;Pentose and glucuronate interconversions;Bile secretion;Ascorbate and aldarate metabolism;Biosynthesis of cofactors
21	200.129	neg	Methylisopelletierine	8.428E-5	2.7427	2.7011	0.5919	-0.7566	3.89E-6	down	map01110;map00960;map01064	Biosynthesis of secondary metabolites;Tropane, piperidine and pyridine alkaloid biosynthesis;Biosynthesis of alkaloids derived from ornithine, lysine and nicotinic acid
22	245.077	pos	Pseudouridine	8.107E-5	2.7336	2.7209	1.7729	0.8261	3.651E-6	up	map00240;map01100	Pyrimidine metabolism;Metabolic pathways
23	627.461	pos	DG(14:0/20:4(5Z,8Z,11Z,14Z)-OH(19S)/0:0)	0.004236	2.7247	2.6981	0.5859	-0.7712	0.001244	down	-	-
24	287.056	neg	Benzoate	0.02692	2.7029	2.696	1.8851	0.9147	0.01314	up	map01100;map01220;map00996;map01110;map01120;map00627;map00623;map00621;map00362;map01063	Metabolic pathways;Degradation of aromatic compounds;Biosynthesis of various alkaloids;Biosynthesis of secondary metabolites;Microbial metabolism in diverse environments;Aminobenzoate degradation;Toluene degradation;Dioxin degradation;Benzoate degradation;Biosynthesis of alkaloids derived from shikimate pathway
25	567.462	neg	TG(8:0/8:0/i-15:0)	0.001551	2.6793	2.6418	0.6335	-0.6587	0.0003157	down	map01100;map04979;map00561;map04977;map04975;map04923;map04714;map05417;map04931	Metabolic pathways;Cholesterol metabolism;Glycerolipid metabolism;Vitamin digestion and absorption;Fat digestion and absorption;Regulation of lipolysis in adipocytes;Thermogenesis;Lipid and atherosclerosis;Insulin resistance
26	174.088	neg	Citrulline	0.0001473	2.6743	2.6513	1.6724	0.7419	9.512E-6	up	map01100;map00220;map01110;map01230	Metabolic pathways;Arginine biosynthesis;Biosynthesis of secondary metabolites;Biosynthesis of amino acids
27	579.154	neg	7-[3-O-(4-Hydroxycinnamoyl)-Beta-D-glucopyranosyloxy]-4',5-Dihydroxyflavanone	0.000712	2.6675	2.618	1.9201	0.9412	0.0001059	up	-	-
28	369.119	pos	3-O-Feruloylquinic acid	7.516E-5	2.6609	2.6216	1.6471	0.7199	3.135E-6	up	-	-
29	617.094	neg	3'-Hydroxygenistein	0.02878	2.6609	2.7389	0.4005	-1.3201	0.01428	down	-	-
30	504.172	pos	Aminopterin	0.02676	2.6421	2.6314	1.9976	0.9982	0.01304	up	-	-
31	679.512	pos	DG(PGE2/0:0/i-17:0)	7.393E-6	2.6404	2.6128	0.6491	-0.6235	3.416E-8	down	-	-
32	573.452	neg	DG(16:1(9Z)/15:0/0:0)	0.01656	2.6308	2.6047	0.5375	-0.8956	0.00719	down	map05214;map05167;map04650;map05163;map04750;map05235;map04015;map04014;map04659;map04540;map04010;map04012;map05022;map04370;map04371;map04072;map04071;map04975;map05143;map05012;map05231;map05146;map04919;map05200;map04961;map04745;map04921;map04920;map04923;map04925;map05017;map04625;map04929;map04726;map04725;map04724;map04723;map04722;map05223;map04720;map04666;map05170;map04664;map04658;map…	Glioma;Kaposi sarcoma-associated herpesvirus infection;Natural killer cell mediated cytotoxicity;Human cytomegalovirus infection;Inflammatory mediator regulation of TRP channels;PD-L1 expression and PD-1 checkpoint pathway in cancer;Rap1 signaling pathway;Ras signaling pathway;Th17 cell differentiation;Gap junction;MAPK signaling pathway;ErbB signaling pathway;Pathways of neurodegeneration - mult…
33	465.272	pos	LysoPE(0:0/14:1(9Z))	0.007063	2.6221	2.6174	0.5854	-0.7726	0.002437	down	-	-
34	226.129	pos	N-alpha-acetyl lysine methyl ester	0.009374	2.6061	2.6727	3.1336	1.6478	0.003494	up	-	-
35	243.066	neg	2-Hydroxybenzaldehyde	0.0001654	2.6015	2.5742	1.7088	0.773	1.14E-5	up	map00626;map01100;map01120;map01061;map01220	Naphthalene degradation;Metabolic pathways;Microbial metabolism in diverse environments;Biosynthesis of phenylpropanoids;Degradation of aromatic compounds
36	391.105	neg	Alinamin	0.0001628	2.5841	2.5925	1.5969	0.6753	1.109E-5	up	-	-
37	323.114	neg	Histidylphenylalanine	0.0008344	2.5555	2.5277	0.6224	-0.6841	0.0001332	down	-	-
38	337.092	pos	Dattelic acid	0.001679	2.546	2.479	1.5272	0.6109	0.0003507	up	map01100;map00941;map00940;map01110;map00945	Metabolic pathways;Flavonoid biosynthesis;Phenylpropanoid biosynthesis;Biosynthesis of secondary metabolites;Stilbenoid, diarylheptanoid and gingerol biosynthesis
39	530.13	pos	(2S,3S,4S,5R)-6-[[2-(3,4-Dihydroxyphenyl)-5,7-dihydroxy-3,4-dihydro-2H-chromen-3-yl]oxy]-3,4,5-trihydroxyoxane-2-carboxylic acid	8.886E-6	2.5447	2.5328	1.5486	0.631	4.86E-8	up	-	-
40	387.069	neg	Prodiamine	3.283E-5	2.5443	2.543	1.6145	0.6911	6.759E-7	up	-	-
41	401.135	pos	Avenanthramide 2	0.0004473	2.5428	2.5091	1.5951	0.6737	5.269E-5	up	-	-
42	237.04	neg	2H-Pyran-2-one	4.688E-6	2.5412	2.5148	0.6433	-0.6365	1.315E-8	down	-	-
43	270.114	neg	(R)-Higenamine	0.002949	2.5295	2.4764	1.5117	0.5962	0.0007572	up	-	-
44	273.113	neg	11,12-Dimethoxydihydrokawain	0.00245	2.5243	2.4781	1.577	0.6572	0.000591	up	-	-
45	633.172	neg	Lanceolatin C	0.06553	2.5239	2.5375	2.2448	1.1666	0.0385	up	-	-
46	309.107	neg	Valine-betaxanthin	0.0005031	2.5224	2.4913	1.9913	0.9937	6.371E-5	up	-	-
47	399.166	neg	Propofol glucuronide	7.829E-5	2.5122	2.4937	1.5787	0.6587	3.386E-6	up	-	-
48	378.214	pos	Arphamenine B	0.001382	2.5099	2.5048	0.6281	-0.6709	0.0002698	down	-	-
49	469.133	pos	Lucuminic acid	0.0008776	2.5031	2.4524	1.5578	0.6395	0.000143	up	-	-
50	496.204	pos	Kelampayoside A	7.564E-5	2.487	2.4603	1.5702	0.651	3.19E-6	up	-	-
51	359.256	pos	MG(0:0/20:3(8Z,11Z,14Z)-O(5,6)/0:0)	0.0527	2.4812	2.5307	0.4468	-1.1622	0.02965	down	-	-
52	122.028	pos	L-Cysteine	1.532E-5	2.471	2.4406	1.7384	0.7978	1.479E-7	up	map00311;map01240;map00270;map01200;map00332;map01110;map04216;map00770;map00920;map00430;map00730;map00470;map04122;map01060;map01100;map00480;map01120;map01230;map00260;map00460;map04974;map00970;map05230	Penicillin and cephalosporin biosynthesis;Biosynthesis of cofactors;Cysteine and methionine metabolism;Carbon metabolism;Carbapenem biosynthesis;Biosynthesis of secondary metabolites;Ferroptosis;Pantothenate and CoA biosynthesis;Sulfur metabolism;Taurine and hypotaurine metabolism;Thiamine metabolism;D-Amino acid metabolism;Sulfur relay system;Biosynthesis of plant secondary metabolites;Metabolic…
53	263.077	neg	Xylobiose	0.000184	2.4628	2.422	1.5629	0.6442	1.345E-5	up	map02010	ABC transporters
54	471.151	pos	Loquatoside	8.059E-5	2.4623	2.414	1.5027	0.5876	3.583E-6	up	-	-
55	451.105	neg	(-)-Epigallocatechin 3-p-coumaroate	0.00149	2.4592	2.4013	1.5926	0.6714	0.0002992	up	-	-
56	361.199	pos	Tryptophyl-Arginine	0.0004556	2.4516	2.3986	1.602	0.6799	5.433E-5	up	-	-
57	511.105	neg	Brassicanal B	5.164E-5	2.4514	2.4349	1.5141	0.5985	1.513E-6	up	-	-
58	287.092	pos	Vestitone	0.00278	2.4435	2.4037	1.9578	0.9693	0.0006991	up	map00943;map01100;map01110	Isoflavonoid biosynthesis;Metabolic pathways;Biosynthesis of secondary metabolites
59	308.14	pos	Indoxyl	0.03227	2.4356	2.3364	2.335	1.2234	0.01642	up	map00380	Tryptophan metabolism
60	517.135	pos	2'',3''-Diacetylcosmosiin	2.753E-5	2.4328	2.406	1.5127	0.5971	4.863E-7	up	-	-
61	262.072	neg	2-(Quinolin-8-yloxy)propanoic acid	0.0002587	2.4312	2.4043	0.6321	-0.6618	2.278E-5	down	-	-
62	495.13	neg	3-Hydroxychavicol 1-[rhamnosyl-(1->6)-glucoside]	0.02641	2.4306	2.5437	1.8843	0.914	0.01282	up	-	-
63	186.055	pos	Benzofuran ketone	0.000684	2.4279	2.3788	1.6343	0.7086	0.0001001	up	-	-
64	401.145	neg	Benzyl O-[arabinofuranosyl-(1->6)-glucoside]	2.774E-5	2.4257	2.3896	1.5435	0.6262	4.945E-7	up	-	-
65	325.119	pos	Aristolodione	0.008807	2.4254	2.3286	1.8017	0.8494	0.003231	up	-	-
66	440.187	neg	(R)-pantoate	0.01077	2.4174	2.4565	0.5912	-0.7583	0.004169	down	map01100;map01110;map00770;map01240	Metabolic pathways;Biosynthesis of secondary metabolites;Pantothenate and CoA biosynthesis;Biosynthesis of cofactors
67	579.208	neg	(+)-Syringaresinol O-beta-D-glucoside	2.338E-5	2.4105	2.3866	1.5002	0.5851	3.473E-7	up	-	-
68	315.05	pos	Patuletin	0.0001409	2.3831	2.3301	1.556	0.6378	8.877E-6	up	-	-
69	249.046	pos	Alanyl-Aspartic acid	0.0007933	2.3758	2.3365	1.607	0.6844	0.0001238	up	-	-
70	381.119	neg	Amidoxime	0.01063	2.3704	2.315	1.552	0.6342	0.004095	up	-	-
71	423.187	neg	(-)-2-Difluoromethylornithine	0.02485	2.3661	2.3787	2.8826	1.5274	0.01193	up	-	-
72	492.13	neg	Norfluoxetine glucuronide	0.002138	2.3635	2.3022	1.5758	0.6561	0.0004893	up	-	-
73	422.145	pos	Cassiaside	0.0256	2.3567	2.2527	1.7773	0.8297	0.01236	up	-	-
74	327.051	neg	Aflatoxin G	6.435E-5	2.3546	2.3197	0.6559	-0.6085	2.322E-6	down	map01100;map01110;map00254	Metabolic pathways;Biosynthesis of secondary metabolites;Aflatoxin biosynthesis
75	301.155	pos	Phenylalanylisoleucine	0.0004649	2.3544	2.3558	1.6979	0.7638	5.656E-5	up	-	-
76	374.218	pos	Xanthoplanine	0.005709	2.345	2.2754	1.5904	0.6694	0.001859	up	-	-
77	329.152	neg	Embelin	0.0001114	2.3343	2.32	1.5005	0.5854	6.032E-6	up	-	-
78	330.14	pos	Imidazolelactic acid	0.00051	2.3228	2.313	1.5246	0.6084	6.503E-5	up	-	-
79	292.118	pos	Phloretin	0.03782	2.3195	2.2574	1.7144	0.7777	0.01992	up	map01100;map00941;map01110;map00946	Metabolic pathways;Flavonoid biosynthesis;Biosynthesis of secondary metabolites;Degradation of flavonoids
80	319.141	pos	Salicin	0.006496	2.309	2.3202	1.7592	0.8149	0.002195	up	map00010;map02060;map04742;map01061	Glycolysis / Gluconeogenesis;Phosphotransferase system (PTS);Taste transduction;Biosynthesis of phenylpropanoids
81	607.435	pos	DG(18:3(9Z,12Z,15Z)/14:0/0:0)	0.04308	2.2948	2.228	0.6227	-0.6834	0.02333	down	map05214;map05167;map04650;map05163;map04750;map05235;map04015;map04014;map04659;map04540;map04010;map04012;map05022;map04370;map04371;map04072;map04071;map04975;map05143;map05012;map05231;map05146;map04919;map05200;map04961;map04745;map04921;map04920;map04923;map04925;map05017;map04625;map04929;map04726;map04725;map04724;map04723;map04722;map05223;map04720;map04666;map05170;map04664;map04658;map…	Glioma;Kaposi sarcoma-associated herpesvirus infection;Natural killer cell mediated cytotoxicity;Human cytomegalovirus infection;Inflammatory mediator regulation of TRP channels;PD-L1 expression and PD-1 checkpoint pathway in cancer;Rap1 signaling pathway;Ras signaling pathway;Th17 cell differentiation;Gap junction;MAPK signaling pathway;ErbB signaling pathway;Pathways of neurodegeneration - mult…
82	367.046	neg	Vanilloyl glucose	0.02595	2.2777	2.337	0.606	-0.7225	0.01256	down	-	-
83	389.174	neg	15-Keto-prostaglandin F2a	0.02186	2.2567	2.2761	0.6362	-0.6525	0.01017	down	map00590	Arachidonic acid metabolism
84	250.094	pos	Vidarabine	0.01535	2.2552	2.2249	1.6812	0.7495	0.006535	up	-	-
85	256.177	pos	Pirimicarb	6.629E-5	2.2513	2.2556	1.5228	0.6068	2.493E-6	up	-	-
86	126.067	pos	5-Methylcytosine	0.002629	2.2497	2.2332	1.6319	0.7065	0.0006496	up	map00240;map01100	Pyrimidine metabolism;Metabolic pathways
87	451.172	pos	N-((6-Methyl-5-oxo-3-thiomorpholinyl)carbonyl)-L-histidyl-L-proline	0.0143	2.2389	2.1973	1.7257	0.7872	0.00596	up	-	-
88	288.203	pos	Leu Arg	0.01802	2.2033	2.2033	1.5381	0.6212	0.007985	up	-	-
89	500.12	pos	4-(2-Nitroethyl)phenyl primeveroside	0.002928	2.1877	2.1133	1.5854	0.6649	0.0007493	up	-	-
90	250.108	neg	Endralazine	0.0008438	2.1756	2.1465	0.6633	-0.5924	0.0001352	down	-	-
91	281.064	pos	Triflusal	0.01108	2.174	2.116	0.6526	-0.6157	0.004321	down	-	-
92	288.124	pos	Marmesin	0.006015	2.1696	2.1253	1.5146	0.5989	0.001991	up	map01110;map00999;map01061	Biosynthesis of secondary metabolites;Biosynthesis of various plant secondary metabolites;Biosynthesis of phenylpropanoids
93	245.093	pos	BUTHIONINE SULFOXIMINE	0.06872	2.1447	1.9906	2.0851	1.0601	0.04073	up	-	-
94	611.162	pos	Delphinidin 3-rutinoside	0.04872	2.0905	2.0127	1.6689	0.7389	0.02702	up	map00942	Anthocyanin biosynthesis
95	445.078	neg	6-Hydroxyluteolin 7-glucoside	0.01069	2.0713	2.0221	1.6192	0.6953	0.004129	up	-	-
96	256.103	pos	2-Keto-3-Deoxy-D-Mannooctanoic Acid	0.02018	2.0251	2.0602	1.5315	0.615	0.009218	up	-	-
97	175.024	neg	Ascorbic Acid	0.0334	1.8448	1.9012	1.6925	0.7592	0.01715	up	map01100;map00480;map01110;map01120;map01240;map04977;map00053;map02060;map04066	Metabolic pathways;Glutathione metabolism;Biosynthesis of secondary metabolites;Microbial metabolism in diverse environments;Biosynthesis of cofactors;Vitamin digestion and absorption;Ascorbate and aldarate metabolism;Phosphotransferase system (PTS);HIF-1 signaling pathway

## Sheet: FO VS FL
No.	M/Z	Mode	Metabolite	FDR	VIP_pred_OPLS-DA	VIP_PLS-DA	FC(FO/FL)	Log2FC(FO/FL)	P_value	Regulate	KEGG Pathway ID	KEGG Pathway Description
1	420.192	pos	DV 7751a	5.448E-6	4.6912	4.7161	7.5535	2.9172	1.02E-8	up	-	-
2	386.124	pos	Averufin	1.953E-5	4.4875	4.5067	25.8388	4.6915	1.428E-7	up	-	-
3	267.099	neg	Musk ambrette	0.0009147	4.4796	4.3923	0.1593	-2.65	7.244E-5	down	-	-
4	245.093	pos	DL-Buthionine sulfoximine	0.0002316	4.2612	4.3067	7.1585	2.8396	8.914E-6	up	-	-
5	225.124	pos	Gamma-Glutamylleucine	5.448E-6	4.2154	4.204	20.9186	4.3867	9.968E-9	up	-	-
6	296.125	pos	P-Hydroxyfelbamate	0.007156	4.1383	4.0516	0.2079	-2.2662	0.00146	down	map00982	Drug metabolism - cytochrome P450
7	353.135	neg	Gibberellin A40	8.718E-6	3.9992	3.995	2.4327	1.2825	2.822E-8	up	map01110;map00904	Biosynthesis of secondary metabolites;Diterpenoid biosynthesis
8	287.056	neg	Benzoate	0.004357	3.8607	3.7842	2.359	1.2381	0.0007375	up	map01100;map01220;map00996;map01110;map01120;map00627;map00623;map00621;map00362;map01063	Metabolic pathways;Degradation of aromatic compounds;Biosynthesis of various alkaloids;Biosynthesis of secondary metabolites;Microbial metabolism in diverse environments;Aminobenzoate degradation;Toluene degradation;Dioxin degradation;Benzoate degradation;Biosynthesis of alkaloids derived from shikimate pathway
9	340.155	pos	Rutacridone	0.0008496	3.7868	3.8197	3.0953	1.6301	6.555E-5	up	map00996;map01110;map01063	Biosynthesis of various alkaloids;Biosynthesis of secondary metabolites;Biosynthesis of alkaloids derived from shikimate pathway
10	358.129	neg	Moupinamide	1.359E-5	3.7685	3.7693	2.0371	1.0265	7.233E-8	up	-	-
11	401.135	pos	Avenanthramide 2	7.476E-5	3.7611	3.7456	2.1824	1.1259	1.467E-6	up	-	-
12	309.145	neg	Estriol	0.0001507	3.6633	3.6362	1.9566	0.9684	4.635E-6	up	map01100;map07226;map00140	Metabolic pathways;Progesterone, androgen and estrogen receptor agonists/antagonists;Steroid hormone biosynthesis
13	495.13	neg	3-Hydroxychavicol 1-[rhamnosyl-(1->6)-glucoside]	0.002136	3.6468	3.5807	2.4172	1.2734	0.0002677	up	-	-
14	256.082	pos	Nicotinic acid ribonucleoside	5.448E-6	3.6137	3.5921	0.5241	-0.9321	9.917E-9	down	map01100;map00760	Metabolic pathways;Nicotinate and nicotinamide metabolism
15	398.145	pos	Trans-p-Feruloyl-beta-D-glucopyranoside	0.0008548	3.5893	3.5871	3.3943	1.7631	6.625E-5	up	-	-
16	302.136	neg	Cycloheximide	0.0003911	3.5876	3.5462	0.4362	-1.1971	1.979E-5	down	-	-
17	183.048	pos	6-[Ethoxy(mercapto)methylidene]-1-cyclohexa-2,4-dienone	0.0007248	3.5529	3.4949	2.5299	1.3391	5.079E-5	up	-	-
18	155.045	neg	N-formimidoyl-glutamic acid	7.683E-5	3.5177	3.5062	2.0032	1.0023	1.559E-6	up	map01100;map00340	Metabolic pathways;Histidine metabolism
19	292.13	pos	Ser Trp	0.02041	3.5176	3.4	0.3696	-1.4361	0.00598	down	-	-
20	272.129	pos	Norhydromorphone	0.0007754	3.4822	3.4604	1.6596	0.7309	5.624E-5	up	-	-
21	404.135	pos	Nedocromil	0.000189	3.4619	3.4187	1.6375	0.7115	6.391E-6	up	-	-
22	323.172	pos	Trimethoprim	0.005668	3.4516	3.462	0.4368	-1.1949	0.001068	down	-	-
23	239.103	pos	N-Hydroxy-L-tyrosine	0.002884	3.4354	3.3182	0.4972	-1.0082	0.0004122	down	map00460;map01100;map01110	Cyanoamino acid metabolism;Metabolic pathways;Biosynthesis of secondary metabolites
24	371.135	neg	Loganoside	0.005384	3.4011	3.342	0.5014	-0.996	0.0009938	down	-	-
25	316.119	pos	Citpressine II	4.545E-5	3.384	3.344	1.6679	0.738	6.487E-7	up	-	-
26	259.061	neg	1,10-dihydro-1,10-dihydroxyfluoren-9-one	0.0002681	3.3804	3.3562	1.8335	0.8746	1.11E-5	up	-	-
27	245.093	pos	BUTHIONINE SULFOXIMINE	0.02222	3.3441	3.4391	5.7819	2.5316	0.006699	up	-	-
28	260.092	pos	Skimmianine	0.0001021	3.3389	3.3003	1.6485	0.7212	2.524E-6	up	map00996;map01063	Biosynthesis of various alkaloids;Biosynthesis of alkaloids derived from shikimate pathway
29	398.132	pos	3-Keto-b-D-galactose	0.01345	3.3215	3.2962	0.4435	-1.1729	0.003405	down	-	-
30	456.13	pos	4-Hydroxy-5-[3-(sulfooxy)phenyl]pentanoylcarnitine	0.001641	3.2812	3.2634	1.8087	0.855	0.000176	up	-	-
31	272.173	neg	Valyl-Arginine	0.04295	3.2633	3.3401	0.3955	-1.3384	0.01585	down	-	-
32	303.051	neg	5,6,8-Trihydroxy-2-methylbenzo[g]chromen-4-one	6.852E-5	3.2496	3.2165	1.6587	0.7301	1.263E-6	up	-	-
33	402.119	neg	Gravacridonetriol	2.982E-5	3.2438	3.2724	1.6372	0.7112	3.175E-7	up	-	-
34	312.108	pos	Dopamine glucuronide	0.008701	3.2429	3.1652	1.8492	0.8869	0.001896	up	-	-
35	308.14	pos	Miroprofen	0.0001069	3.2291	3.2582	2.1708	1.1182	2.672E-6	up	-	-
36	421.093	neg	Flavonol 3-O-D-glucoside	0.00016	3.1758	3.1449	1.5158	0.6	5.074E-6	up	-	-
37	237.088	neg	Glycyl-L-Tyrosine	5.101E-5	3.174	3.0831	0.5882	-0.7656	7.996E-7	down	-	-
38	236.129	pos	2-(3-Carboxy-3-(methylammonio)propyl)-L-histidine	1.349E-5	3.1559	3.1018	1.5741	0.6546	6.999E-8	up	-	-
39	318.134	pos	Melilotocarpan A	6.636E-6	3.155	3.136	1.8095	0.8556	1.523E-8	up	-	-
40	213.066	pos	5-Hydroxyindoleacetylglycine	0.01709	3.131	3.0849	3.6071	1.8508	0.00468	up	map00380	Tryptophan metabolism
41	272.115	pos	(2-Quinoxalinylmethylene)hydrazinecarboxylic acid methyl ester	0.001476	3.0942	3.0879	1.7197	0.7821	0.0001508	up	-	-
42	273.113	neg	11,12-Dimethoxydihydrokawain	0.003097	3.0897	3.0568	1.6287	0.7037	0.000455	up	-	-
43	270.114	neg	(R)-Higenamine	0.003679	3.0809	3.0548	1.5553	0.6372	0.000586	up	-	-
44	257.118	pos	7-Hydroxy-5-methoxyflavan	0.0008634	3.0769	3.0487	1.5889	0.668	6.742E-5	up	-	-
45	437.157	pos	3'-Hydroxy-T2-triol	0.06515	3.0718	2.8875	2.9394	1.5555	0.02702	up	-	-
46	420.224	pos	D-Linalool 3-(6''-malonylglucoside)	0.00485	3.014	2.9858	0.6249	-0.6784	0.0008561	down	-	-
47	272.092	pos	Chrysophanol	0.0003956	3.0116	2.9806	1.5304	0.6139	2.019E-5	up	-	-
48	384.109	neg	20-Hydroxyrutacridone epoxide	0.04068	3.0006	3.1636	4.4135	2.1419	0.01478	up	-	-
49	173.104	neg	2-Amino-4-[carbamimidoyl(methyl)amino]butanoic acid	0.0004472	2.9956	2.9814	0.6623	-0.5944	2.488E-5	down	-	-
50	281.15	pos	Boc-D-FMK	0.01689	2.9869	2.9742	1.9166	0.9385	0.004609	up	-	-
51	454.114	neg	Glycine, L-gamma-glutamyl-2-(1-methyl-4-(nitrosothio)-4-piperidinyl)glycyl-	0.004298	2.9763	3.0036	1.8352	0.876	0.0007222	up	-	-
52	422.145	pos	Cassiaside	0.02471	2.9515	3.0345	2.0462	1.0329	0.007718	up	-	-
53	292.118	pos	Phloretin	0.0007277	2.9414	3.0124	1.6515	0.7238	5.138E-5	up	map01100;map00941;map01110;map00946	Metabolic pathways;Flavonoid biosynthesis;Biosynthesis of secondary metabolites;Degradation of flavonoids
54	356.114	pos	Ovalitenone	0.0004507	2.9339	2.9365	1.5921	0.6709	2.525E-5	up	-	-
55	290.139	pos	4',7-Dihydroxy-6-methoxyisoflavan	0.005149	2.9247	2.8486	1.8161	0.8608	0.000934	up	-	-
56	290.125	pos	2-(4-Phenylphenyl)acetohydrazide	0.001496	2.9172	2.9037	1.52	0.6041	0.0001536	up	-	-
57	628.47	neg	Cer(d18:2(4E,14Z)/18:1(12Z)-2OH(9,10))	0.0002566	2.9144	2.8845	1.5864	0.6657	1.034E-5	up	-	-
58	423.187	neg	(-)-2-Difluoromethylornithine	0.03076	2.9024	2.9235	0.5946	-0.7499	0.01031	down	-	-
59	241.029	neg	2-(3-Mercaptopropyl)pentanedioic acid	5.721E-6	2.8826	2.8577	1.6271	0.7023	1.138E-8	up	-	-
60	403.161	neg	7-Aminomethyl-7-carbaguanine	0.005343	2.8771	2.8595	0.6618	-0.5955	0.0009852	down	map01100;map00790	Metabolic pathways;Folate biosynthesis
61	173.092	neg	Glycylvaline	0.001083	2.8601	2.7672	0.645	-0.6327	9.463E-5	down	-	-
62	274.108	pos	7-Ethoxyresorufin	0.003599	2.8324	2.8404	1.6065	0.6839	0.0005699	up	-	-
63	273.16	pos	(2R)-2-[[(2S,3R)-3-Amino-2-hydroxy-4-phenyl-butanoyl]amino]-4-methyl-pentanoic acid	0.00208	2.8217	2.8066	0.6211	-0.6871	0.0002577	down	-	-
64	258.08	pos	3-[(3,4-dimethylphenyl)sulfonylamino]propanoic acid	0.0004161	2.8136	2.7542	1.5476	0.6301	2.214E-5	up	-	-
65	285.019	neg	2-(5'-methylthio)pentylmalate	0.0001635	2.7989	2.7802	1.5312	0.6147	5.246E-6	up	map01210;map00966	2-Oxocarboxylic acid metabolism;Glucosinolate biosynthesis
66	222.149	pos	7-(2-aminophenyl)heptanoic acid	0.00352	2.7965	2.7771	1.5942	0.6729	0.0005537	up	-	-
67	326.161	pos	Paclobutrazol	0.001024	2.7925	2.8542	1.7309	0.7915	8.704E-5	up	-	-
68	346.129	pos	Methyl 2-[(2-pyridin-2-ylimidazo[1,2-a]pyrazin-3-yl)amino]benzoate	0.004451	2.7831	2.8372	1.5776	0.6577	0.000762	up	-	-
69	388.103	pos	DIBOA trihexose	0.0007582	2.7571	2.7865	1.5482	0.6306	5.441E-5	up	map01110;map00944	Biosynthesis of secondary metabolites;Flavone and flavonol biosynthesis
70	367.151	neg	Gibberellin A44	0.06675	2.7528	2.7029	1.5872	0.6665	0.02783	up	-	-
71	374.176	pos	Flavoxate	0.01066	2.7502	2.7643	1.5507	0.633	0.002505	up	-	-
72	308.14	pos	Indoxyl	0.03868	2.742	2.8609	2.4765	1.3083	0.01388	up	map00380	Tryptophan metabolism
73	418.332	pos	Isolithocholic acid	0.01656	2.7383	2.7677	1.5591	0.6408	0.004492	up	map00121	Secondary bile acid biosynthesis
74	155.045	neg	5,5-Dimethylbarbituric acid	0.001384	2.7237	2.7102	1.6412	0.7148	0.0001372	up	-	-
75	290.07	pos	Cephalosporanic acid	0.0004517	2.7206	2.7184	1.553	0.635	2.534E-5	up	-	-
76	202.072	neg	Paramethadione	3.04E-5	2.7117	2.6956	1.5243	0.6081	3.4E-7	up	-	-
77	172.024	neg	Isosorbide Mononitrate	0.0004201	2.6771	2.6153	1.5814	0.6612	2.259E-5	up	-	-
78	308.15	neg	3,4-dimethylideneheptanedioylcarnitine	0.002044	2.6585	2.6902	1.536	0.6192	0.0002506	up	-	-
79	294.135	neg	Acetophenone, 4'-hydroxy-3'-methoxy-2-(2-piperidyl)-	0.0006602	2.6452	2.6737	1.5238	0.6077	4.433E-5	up	-	-
80	367.046	neg	Vanilloyl glucose	0.03793	2.6393	2.6985	2.9624	1.5668	0.01353	up	-	-
81	153.055	neg	2,6-Dihydroxy-4-Methoxytoluene	0.0008773	2.6309	2.5782	1.5807	0.6606	6.881E-5	up	-	-
82	437.16	pos	Ptaquiloside	0.09746	2.5875	2.4955	0.4966	-1.0097	0.04545	down	-	-
83	320.125	pos	Xenognosin A	0.03195	2.5713	2.5728	0.6389	-0.6464	0.01082	down	-	-
84	443.228	pos	Pteroside A	0.03537	2.57	2.6229	0.6633	-0.5922	0.01236	down	-	-
85	382.187	pos	4-Deacetylneosolaniol	0.01254	2.5446	2.5789	1.6176	0.6939	0.00311	up	map00909	Sesquiterpenoid and triterpenoid biosynthesis
86	323.295	pos	Isopropyl linoleate	0.04157	2.5031	2.4266	1.5376	0.6207	0.0152	up	-	-
87	253.071	pos	Buntansin A	0.00728	2.4881	2.555	1.5662	0.6473	0.001491	up	-	-
88	77.0604	pos	(S)-Propane-1,2-diol	0.01719	2.4316	2.3734	1.5477	0.6302	0.004722	up	-	-
89	255.041	neg	1,5-Naphthalene diisocyanate	0.02135	2.4264	2.3909	1.8401	0.8798	0.006359	up	-	-
90	152.047	neg	Metronidazole	0.001776	2.4259	2.4257	1.5032	0.588	0.0002026	up	-	-
91	332.113	pos	Marshrin	0.02638	2.3852	2.4562	1.5783	0.6583	0.008394	up	-	-
92	418.15	pos	(4As,5aR,6R,12aR)-1,10,11,12a-tetrahydroxy-6-methyl-3,12-dioxo-4a,5,5a,6-tetrahydro-4H-tetracene-2-carboxamide	0.02767	2.2355	2.3363	1.5553	0.6372	0.008947	up	-	-
93	321.146	neg	2-Methoxyestrone	0.06734	1.939	1.9979	1.6066	0.684	0.0282	up	map00140	Steroid hormone biosynthesis

## Sheet: WLVS WC
No.	M/Z	Mode	Metabolite	FDR	VIP_pred_OPLS-DA	VIP_PLS-DA	FC(WL/WC)	Log2FC(WL/WC)	P_value	Regulate	KEGG Pathway ID	KEGG Pathway Description
1	272.173	neg	Valyl-Arginine	0.0001819	4.7939	4.7167	31.1769	4.9624	1.476E-6	up	-	-
2	398.145	pos	Trans-p-Feruloyl-beta-D-glucopyranoside	0.0007265	4.2701	4.1343	0.1595	-2.6481	1.328E-5	down	-	-
3	359.256	pos	MG(0:0/20:3(8Z,11Z,14Z)-O(5,6)/0:0)	0.0008043	4.2498	4.1213	0.1428	-2.8077	1.646E-5	down	-	-
4	423.187	neg	(-)-2-Difluoromethylornithine	0.004164	4.186	4.0645	2.9246	1.5482	0.0002424	up	-	-
5	183.048	pos	6-[Ethoxy(mercapto)methylidene]-1-cyclohexa-2,4-dienone	0.001599	4.1162	4.0389	0.3212	-1.6385	4.921E-5	down	-	-
6	371.135	neg	Loganoside	2.519E-5	3.8488	3.7902	2.335	1.2234	4.096E-8	up	-	-
7	155.045	neg	N-formimidoyl-glutamic acid	4.247E-6	3.8198	3.7499	0.4748	-1.0746	2.07E-9	down	map01100;map00340	Metabolic pathways;Histidine metabolism
8	443.228	pos	Pteroside A	0.0006923	3.7379	3.6762	2.1154	1.0809	1.231E-5	up	-	-
9	465.272	pos	LysoPE(0:0/14:1(9Z))	2.926E-5	3.6827	3.6025	0.4707	-1.087	5.477E-8	down	-	-
10	245.093	pos	DL-Buthionine sulfoximine	0.06404	3.6802	3.6623	0.2681	-1.8994	0.01833	down	-	-
11	173.008	neg	Cis-Aconitic Acid	0.0002374	3.6251	3.5486	1.6612	0.7322	2.263E-6	up	map01100;map00630;map01110;map01120;map01210;map01070;map00720;map01065;map00020;map01066;map00660;map01064;map01063;map01062;map01061;map01060	Metabolic pathways;Glyoxylate and dicarboxylate metabolism;Biosynthesis of secondary metabolites;Microbial metabolism in diverse environments;2-Oxocarboxylic acid metabolism;Biosynthesis of plant hormones;Carbon fixation pathways in prokaryotes;Biosynthesis of alkaloids derived from histidine and purine;Citrate cycle (TCA cycle);Biosynthesis of alkaloids derived from terpenoid and polyketide;C5-B…
12	256.082	pos	Nicotinic acid ribonucleoside	8.848E-5	3.5593	3.5034	1.8786	0.9097	4.089E-7	up	map01100;map00760	Metabolic pathways;Nicotinate and nicotinamide metabolism
13	340.155	pos	Rutacridone	0.02668	3.5513	3.5514	0.2539	-1.9778	0.00466	down	map00996;map01110;map01063	Biosynthesis of various alkaloids;Biosynthesis of secondary metabolites;Biosynthesis of alkaloids derived from shikimate pathway
14	296.125	pos	P-Hydroxyfelbamate	0.03512	3.5336	3.3503	3.648	1.8671	0.007185	up	map00982	Drug metabolism - cytochrome P450
15	420.224	pos	D-Linalool 3-(6''-malonylglucoside)	0.0009728	3.5028	3.4444	1.8379	0.878	2.248E-5	up	-	-
16	267.099	neg	Musk ambrette	0.01676	3.4852	3.3237	3.1094	1.6366	0.002233	up	-	-
17	420.192	pos	DV 7751a	0.03452	3.4648	3.4398	0.4321	-1.2104	0.006999	down	-	-
18	403.161	neg	7-Aminomethyl-7-carbaguanine	4.496E-6	3.411	3.3865	1.7465	0.8045	2.743E-9	up	map01100;map00790	Metabolic pathways;Folate biosynthesis
19	440.187	neg	(R)-pantoate	2.519E-5	3.3612	3.2955	0.4779	-1.0652	4.175E-8	down	map01100;map01110;map00770;map01240	Metabolic pathways;Biosynthesis of secondary metabolites;Pantothenate and CoA biosynthesis;Biosynthesis of cofactors
20	337.035	neg	2-(3,4-Dihydroxyphenyl)-5,6-dihydroxy-7-methoxy-4H-1-benzopyran-4-one	0.1177	3.3466	3.2928	0.391	-1.3546	0.04541	down	-	-
21	395.192	neg	(1S,2R,4R,8S)-p-Menthane-2,8,9-triol 9-glucoside	4.101E-5	3.3334	3.2835	1.6405	0.7142	9.594E-8	up	-	-
22	155.045	neg	5,5-Dimethylbarbituric acid	0.0002814	3.3131	3.2468	0.5382	-0.8937	2.88E-6	down	-	-
23	353.135	neg	Gibberellin A40	0.01541	3.3018	3.2499	0.5621	-0.8312	0.001965	down	map01110;map00904	Biosynthesis of secondary metabolites;Diterpenoid biosynthesis
24	332.099	neg	N-Acetyl-7-O-acetylneuraminic acid	0.002567	3.269	3.137	0.5456	-0.874	0.0001046	down	-	-
25	293.124	neg	Prenyl glucoside	0.006322	3.2587	3.1326	1.5564	0.6382	0.0004634	up	-	-
26	312.131	pos	N,n-Dimethylguanosine	0.001451	3.2559	3.2017	1.6735	0.7429	4.217E-5	up	-	-
27	398.132	pos	3-Keto-b-D-galactose	0.01331	3.2457	3.3263	2.0627	1.0446	0.001531	up	-	-
28	126.067	pos	5-Methylcytosine	0.00171	3.2324	3.1383	1.7007	0.7661	5.532E-5	up	map00240;map01100	Pyrimidine metabolism;Metabolic pathways
29	409.184	pos	Alpha-Peroxyachifolide	5.666E-5	3.2289	3.1856	1.6095	0.6866	1.946E-7	up	-	-
30	290.139	pos	4',7-Dihydroxy-6-methoxyisoflavan	0.006338	3.1761	3.0555	0.5143	-0.9595	0.0004658	down	-	-
31	292.13	pos	Ser Trp	0.03174	3.1645	2.9987	2.6276	1.3937	0.006097	up	-	-
32	77.0604	pos	(S)-Propane-1,2-diol	0.001252	3.1024	2.9983	0.5646	-0.8248	3.346E-5	down	-	-
33	309.145	neg	Estriol	0.02499	3.0538	3.009	0.6304	-0.6657	0.004202	down	map01100;map07226;map00140	Metabolic pathways;Progesterone, androgen and estrogen receptor agonists/antagonists;Steroid hormone biosynthesis
34	173.104	neg	2-Amino-4-[carbamimidoyl(methyl)amino]butanoic acid	0.0004419	3.041	2.9635	1.5789	0.6589	5.971E-6	up	-	-
35	380.28	neg	Pentadeca-5,12-dienoylcarnitine	0.07177	3.0216	3.0122	0.5592	-0.8386	0.02182	down	-	-
36	399.13	neg	Methyl (R)-8-Hydroxy-9-decene-4,6-diynoate glucoside	8.999E-6	3.0141	2.9686	1.5421	0.6249	8.422E-9	up	-	-
37	399.13	neg	Methyl helianthenoate F glucoside	0.001156	2.9924	2.9054	1.5927	0.6715	2.936E-5	up	-	-
38	479.249	neg	13-oxo-7-[3,4,5-Trihydroxy-6-(methoxymethyl)oxan-2-yl]oxytetradecanoic Acid	6.986E-5	2.9807	2.9266	1.5154	0.5997	2.615E-7	up	-	-
39	323.172	pos	Trimethoprim	0.01745	2.9723	2.9838	1.873	0.9054	0.002379	up	-	-
40	316.119	pos	Citpressine II	0.01733	2.9645	2.9386	0.6422	-0.639	0.002348	down	-	-
41	649.466	pos	DG(i-13:0/PGF1alpha/0:0)	0.09546	2.9307	2.9058	0.652	-0.6171	0.03344	down	-	-
42	358.129	neg	Moupinamide	0.031	2.9297	2.8864	0.6624	-0.5942	0.005899	down	-	-
43	395.315	pos	MG(0:0/19:0/0:0)	0.0004251	2.9211	2.8277	0.6459	-0.6305	5.594E-6	down	-	-
44	422.145	pos	Cassiaside	0.02081	2.9078	2.9588	0.5204	-0.9423	0.003123	down	-	-
45	429.21	pos	(10S,11R)-Pterosin C 4-glucoside	2.519E-5	2.9074	2.837	1.5013	0.5863	4.42E-8	up	-	-
46	349.176	pos	Pretazettine	0.04434	2.8804	2.7501	0.5948	-0.7496	0.01024	down	-	-
47	318.134	pos	Melilotocarpan A	0.002832	2.8763	2.7792	0.5927	-0.7545	0.0001235	down	-	-
48	401.182	neg	Methyl 7-epi-12-hydroxyjasmonate glucoside	0.001136	2.8658	2.7957	1.5643	0.6455	2.784E-5	up	-	-
49	418.15	pos	(4As,5aR,6R,12aR)-1,10,11,12a-tetrahydroxy-6-methyl-3,12-dioxo-4a,5,5a,6-tetrahydro-4H-tetracene-2-carboxamide	0.004899	2.8416	2.7739	0.5843	-0.7752	0.0003112	down	-	-
50	377.181	neg	Lysyltryptophan	0.003659	2.8086	2.7646	1.5142	0.5986	0.0001963	up	-	-
51	334.188	pos	Timolol	0.008208	2.7875	2.6915	1.5318	0.6152	0.0007115	up	-	-
52	346.129	pos	Methyl 2-[(2-pyridin-2-ylimidazo[1,2-a]pyrazin-3-yl)amino]benzoate	0.006808	2.7814	2.7729	0.6386	-0.647	0.0005188	down	-	-
53	454.114	neg	Glycine, L-gamma-glutamyl-2-(1-methyl-4-(nitrosothio)-4-piperidinyl)glycyl-	0.02748	2.7801	2.7904	0.5522	-0.8567	0.004893	down	-	-
54	351.106	pos	Dihydromelilotoside	0.00299	2.7792	2.7276	1.5198	0.6039	0.0001375	up	-	-
55	292.118	pos	Phloretin	0.01025	2.7453	2.7048	0.6385	-0.6472	0.00102	down	map01100;map00941;map01110;map00946	Metabolic pathways;Flavonoid biosynthesis;Biosynthesis of secondary metabolites;Degradation of flavonoids
56	245.093	pos	BUTHIONINE SULFOXIMINE	0.06818	2.742	2.7733	0.4905	-1.0277	0.02018	down	-	-
57	225.124	pos	Gamma-Glutamylleucine	0.062	2.7274	2.5511	0.1117	-3.1623	0.01746	down	-	-
58	452.251	pos	PA(8:0/10:0)	0.05267	2.7169	2.6882	1.5468	0.6293	0.01352	up	map01100;map00564;map01110;map00561;map05212;map05200;map04975;map04024;map05231;map04072;map04912;map04070;map04666	Metabolic pathways;Glycerophospholipid metabolism;Biosynthesis of secondary metabolites;Glycerolipid metabolism;Pancreatic cancer;Pathways in cancer;Fat digestion and absorption;cAMP signaling pathway;Choline metabolism in cancer;Phospholipase D signaling pathway;GnRH signaling pathway;Phosphatidylinositol signaling system;Fc gamma R-mediated phagocytosis
59	227.082	pos	3'-DEOXY-3'-FLUOROTHYMIDINE	0.08057	2.692	2.5717	1.8913	0.9194	0.02591	up	-	-
60	273.16	pos	(2R)-2-[[(2S,3R)-3-Amino-2-hydroxy-4-phenyl-butanoyl]amino]-4-methyl-pentanoic acid	0.01545	2.6816	2.5381	1.5227	0.6066	0.001977	up	-	-
61	429.101	pos	Glucobrassicanapin	0.004673	2.6786	2.6188	1.5598	0.6414	0.0002903	up	-	-
62	237.088	neg	Glycyl-L-Tyrosine	0.04753	2.633	2.5932	1.5604	0.6419	0.01144	up	-	-
63	259.061	neg	1,10-dihydro-1,10-dihydroxyfluoren-9-one	0.02962	2.6196	2.5974	0.664	-0.5907	0.005515	down	-	-
64	239.103	pos	N-Hydroxy-L-tyrosine	0.01999	2.6025	2.4925	1.6085	0.6858	0.002937	up	map00460;map01100;map01110	Cyanoamino acid metabolism;Metabolic pathways;Biosynthesis of secondary metabolites
65	495.13	neg	3-Hydroxychavicol 1-[rhamnosyl-(1->6)-glucoside]	0.05001	2.5828	2.6633	0.4735	-1.0786	0.01235	down	-	-
66	647.522	pos	DG(20:5(5Z,8Z,11Z,14Z,17Z)/16:0/0:0)	0.08199	2.5408	2.5493	0.6473	-0.6274	0.02667	down	map05214;map05167;map04650;map05163;map04750;map05235;map04015;map04014;map04659;map04540;map04010;map04012;map05022;map04370;map04371;map04072;map04071;map04975;map05143;map05012;map05231;map05146;map04919;map05200;map04961;map04745;map04921;map04920;map04923;map04925;map05017;map04625;map04929;map04726;map04725;map04724;map04723;map04722;map05223;map04720;map04666;map05170;map04664;map04658;map…	Glioma;Kaposi sarcoma-associated herpesvirus infection;Natural killer cell mediated cytotoxicity;Human cytomegalovirus infection;Inflammatory mediator regulation of TRP channels;PD-L1 expression and PD-1 checkpoint pathway in cancer;Rap1 signaling pathway;Ras signaling pathway;Th17 cell differentiation;Gap junction;MAPK signaling pathway;ErbB signaling pathway;Pathways of neurodegeneration - mult…
67	341.044	neg	Protosappanin B	0.05035	2.5131	2.4623	1.6357	0.7099	0.01251	up	-	-
68	487.195	pos	15-Hydroxynorandrostene-3,17-dione glucuronide	0.09205	2.5091	2.366	0.3867	-1.3707	0.03169	down	map01100;map00040;map04976;map00053;map01240	Metabolic pathways;Pentose and glucuronate interconversions;Bile secretion;Ascorbate and aldarate metabolism;Biosynthesis of cofactors
69	320.125	pos	Xenognosin A	0.06099	2.4167	2.2672	1.6884	0.7557	0.01705	up	-	-
70	227.082	pos	Homomethionine	0.05472	2.3954	2.3674	1.5652	0.6464	0.01435	up	map01210;map01110;map00966	2-Oxocarboxylic acid metabolism;Biosynthesis of secondary metabolites;Glucosinolate biosynthesis
71	226.129	pos	N-alpha-acetyl lysine methyl ester	0.1118	2.394	2.4468	1.5493	0.6316	0.04205	up	-	-
72	175.024	neg	Ascorbic Acid	0.04289	2.346	2.3341	1.6139	0.6906	0.009762	up	map01100;map00480;map01110;map01120;map01240;map04977;map00053;map02060;map04066	Metabolic pathways;Glutathione metabolism;Biosynthesis of secondary metabolites;Microbial metabolism in diverse environments;Biosynthesis of cofactors;Vitamin digestion and absorption;Ascorbate and aldarate metabolism;Phosphotransferase system (PTS);HIF-1 signaling pathway
73	308.14	pos	Indoxyl	0.08104	2.2344	2.4073	0.4108	-1.2835	0.02617	down	map00380	Tryptophan metabolism
74	321.146	neg	2-Methoxyestrone	0.03434	2.1809	2.1295	0.6306	-0.6651	0.006924	down	map00140	Steroid hormone biosynthesis

## Sheet: WO VS WC
No.	M/Z	Mode	Metabolite	FDR	VIP_pred_OPLS-DA	VIP_PLS-DA	FC(WO/WC)	Log2FC(WO/WC)	P_value	Regulate	KEGG Pathway ID	KEGG Pathway Description
1	337.035	neg	2-(3,4-Dihydroxyphenyl)-5,6-dihydroxy-7-methoxy-4H-1-benzopyran-4-one	0.02113	5.9202	5.3734	0.1923	-2.3785	0.0004486	down	-	-
2	377.182	pos	Yohimbine	0.06811	4.4451	4.1378	2.1615	1.1121	0.009148	up	-	-
3	247.043	pos	N-(2-Hydroxy-3,3,3-trifluoropropyl)-2-(2-nitro-1-imidazolyl)acetamide	0.09679	4.3214	3.9013	2.2002	1.1376	0.01818	up	-	-
4	367.046	neg	Vanilloyl glucose	0.09203	4.0315	3.6233	0.5466	-0.8715	0.01673	down	-	-
5	175.024	neg	Ascorbic Acid	0.06209	3.5711	3.1199	1.6264	0.7017	0.007532	up	map01100;map00480;map01110;map01120;map01240;map04977;map00053;map02060;map04066	Metabolic pathways;Glutathione metabolism;Biosynthesis of secondary metabolites;Microbial metabolism in diverse environments;Biosynthesis of cofactors;Vitamin digestion and absorption;Ascorbate and aldarate metabolism;Phosphotransferase system (PTS);HIF-1 signaling pathway
6	227.082	pos	3'-DEOXY-3'-FLUOROTHYMIDINE	0.1404	3.4312	3.7251	0.1949	-2.3589	0.03752	down	-	-
7	451.172	pos	N-((6-Methyl-5-oxo-3-thiomorpholinyl)carbonyl)-L-histidyl-L-proline	0.06397	3.2158	3.2251	1.5193	0.6034	0.007966	up	-	-
8	621.414	pos	Coriandrinol	0.1369	2.979	2.6689	0.6536	-0.6135	0.03579	down	-	-
9	302.136	neg	Cycloheximide	0.08169	2.8309	2.678	0.6313	-0.6637	0.01313	down	-	-

## Sheet: WO VS WL
No.	M/Z	Mode	Metabolite	FDR	VIP_pred_OPLS-DA	VIP_PLS-DA	FC(WO/WL)	Log2FC(WO/WL)	P_value	Regulate	KEGG Pathway ID	KEGG Pathway Description
1	267.099	neg	Musk ambrette	0.005832	4.8187	4.7685	0.0528	-4.2438	0.0004817	down	-	-
2	227.082	pos	3'-DEOXY-3'-FLUOROTHYMIDINE	0.000479	4.7715	4.7408	0.1031	-3.2783	9.666E-6	down	-	-
3	359.256	pos	MG(0:0/20:3(8Z,11Z,14Z)-O(5,6)/0:0)	0.0005572	4.5634	4.5524	7.0002	2.8074	1.252E-5	up	-	-
4	296.125	pos	P-Hydroxyfelbamate	0.002537	4.5349	4.5062	0.1084	-3.2056	0.0001381	down	map00982	Drug metabolism - cytochrome P450
5	437.157	pos	3'-Hydroxy-T2-triol	0.02824	4.1762	4.188	13.499	3.7548	0.004452	up	-	-
6	371.135	neg	Loganoside	0.000304	4.0405	4.0362	0.4505	-1.1502	4.571E-6	down	-	-
7	256.082	pos	Nicotinic acid ribonucleoside	0.002537	3.946	3.9418	0.5143	-0.9593	0.0001385	down	map01100;map00760	Metabolic pathways;Nicotinate and nicotinamide metabolism
8	155.045	neg	N-formimidoyl-glutamic acid	1.699E-5	3.8475	3.8418	1.9715	0.9793	3.337E-8	up	map01100;map00340	Metabolic pathways;Histidine metabolism
9	272.173	neg	Valyl-Arginine	0.04268	3.833	3.9081	0.2939	-1.7667	0.008103	down	-	-
10	340.155	pos	Rutacridone	0.03381	3.7891	3.8427	3.8769	1.9549	0.005764	up	map00996;map01110;map01063	Biosynthesis of various alkaloids;Biosynthesis of secondary metabolites;Biosynthesis of alkaloids derived from shikimate pathway
11	423.187	neg	(-)-2-Difluoromethylornithine	0.002321	3.7861	3.8097	0.53	-0.9159	0.0001215	down	-	-
12	487.195	pos	15-Hydroxynorandrostene-3,17-dione glucuronide	0.001506	3.7597	3.7415	3.2539	1.7022	6.07E-5	up	map01100;map00040;map04976;map00053;map01240	Metabolic pathways;Pentose and glucuronate interconversions;Bile secretion;Ascorbate and aldarate metabolism;Biosynthesis of cofactors
13	398.145	pos	Trans-p-Feruloyl-beta-D-glucopyranoside	0.03167	3.7011	3.7505	5.282	2.4011	0.005222	up	-	-
14	213.066	pos	5-Hydroxyindoleacetylglycine	0.007779	3.6942	3.6191	0.3248	-1.6223	0.0007302	down	map00380	Tryptophan metabolism
15	420.224	pos	D-Linalool 3-(6''-malonylglucoside)	5.963E-6	3.6908	3.6862	0.5634	-0.8277	4.878E-9	down	-	-
16	302.136	neg	Cycloheximide	0.001726	3.6699	3.6227	0.4675	-1.0969	7.561E-5	down	-	-
17	420.192	pos	DV 7751a	0.02525	3.637	3.6917	2.3155	1.2113	0.003822	up	-	-
18	332.099	neg	N-Acetyl-7-O-acetylneuraminic acid	0.009182	3.5859	3.5464	1.8289	0.871	0.0009275	up	-	-
19	292.13	pos	Ser Trp	0.02465	3.5701	3.5275	0.3269	-1.6133	0.003699	down	-	-
20	401.135	pos	Avenanthramide 2	0.009518	3.5551	3.5238	1.7802	0.832	0.0009727	up	-	-
21	225.124	pos	Gamma-Glutamylleucine	0.02894	3.5141	3.4405	11.4072	3.5119	0.004603	up	-	-
22	273.16	pos	Maoto	0.0009991	3.4735	3.4625	0.5873	-0.7677	3.091E-5	down	-	-
23	290.139	pos	4',7-Dihydroxy-6-methoxyisoflavan	0.0001513	3.4085	3.4015	1.8873	0.9164	1.602E-6	up	-	-
24	273.16	pos	(2R)-2-[[(2S,3R)-3-Amino-2-hydroxy-4-phenyl-butanoyl]amino]-4-methyl-pentanoic acid	0.001578	3.4003	3.3743	0.5737	-0.8015	6.601E-5	down	-	-
25	403.161	neg	7-Aminomethyl-7-carbaguanine	0.000372	3.3188	3.3163	0.6476	-0.6268	6.331E-6	down	map01100;map00790	Metabolic pathways;Folate biosynthesis
26	399.13	neg	Methyl helianthenoate F glucoside	0.001835	3.2784	3.272	0.6079	-0.7181	8.372E-5	down	-	-
27	349.176	pos	Pretazettine	0.04734	3.2704	3.2282	1.741	0.7999	0.009414	up	-	-
28	398.132	pos	3-Keto-b-D-galactose	0.01008	3.2696	3.2556	0.5718	-0.8063	0.001063	down	-	-
29	227.082	pos	Homomethionine	0.007058	3.2443	3.2355	0.5462	-0.8725	0.0006291	down	map01210;map01110;map00966	2-Oxocarboxylic acid metabolism;Biosynthesis of secondary metabolites;Glucosinolate biosynthesis
30	495.13	neg	3-Hydroxychavicol 1-[rhamnosyl-(1->6)-glucoside]	0.04576	3.2415	3.2878	2.4194	1.2746	0.008942	up	-	-
31	292.086	pos	Prontosil	0.0008337	3.228	3.1979	1.6602	0.7314	2.194E-5	up	map07055	Sulfonamide derivatives - overview
32	258.08	pos	3-[(3,4-dimethylphenyl)sulfonylamino]propanoic acid	0.001905	3.2139	3.1878	1.6191	0.6952	8.943E-5	up	-	-
33	443.228	pos	Pteroside A	0.01245	3.2104	3.2478	0.6068	-0.7206	0.001444	down	-	-
34	183.048	pos	6-[Ethoxy(mercapto)methylidene]-1-cyclohexa-2,4-dienone	0.0227	3.1822	3.196	2.3415	1.2274	0.003282	up	-	-
35	323.172	pos	Trimethoprim	0.02347	3.1252	3.1918	0.5458	-0.8735	0.003439	down	-	-
36	155.045	neg	5,5-Dimethylbarbituric acid	9.796E-5	3.1107	3.1133	1.6667	0.737	7.736E-7	up	-	-
37	244.082	pos	Isochorismate	3.088E-5	3.0955	3.0893	1.5617	0.6431	1.06E-7	up	map01100;map01110;map01240;map00130;map01053;map01070;map01061	Metabolic pathways;Biosynthesis of secondary metabolites;Biosynthesis of cofactors;Ubiquinone and other terpenoid-quinone biosynthesis;Biosynthesis of siderophore group nonribosomal peptides;Biosynthesis of plant hormones;Biosynthesis of phenylpropanoids
38	245.093	pos	DL-Buthionine sulfoximine	0.1294	3.0846	3.1872	3.2368	1.6946	0.04148	up	-	-
39	77.0604	pos	(S)-Propane-1,2-diol	5.263E-5	3.078	3.0665	1.6442	0.7174	2.827E-7	up	-	-
40	192.089	pos	Desciclovir	3.191E-5	3.0611	3.033	0.649	-0.6238	1.176E-7	down	-	-
41	366.149	pos	2-(1-carboxy-2-hydroxypropyl)-4-{[5-(dimethylcarbamoyl)pyrrolidin-3-yl]sulfanyl}-3-methyl-3,4-dihydro-2h-pyrrole-5-carboxylic acid	0.0004974	3.0389	3.0256	1.5095	0.594	1.034E-5	up	-	-
42	239.103	pos	N-Hydroxy-L-tyrosine	0.01541	3.012	3.0125	0.57	-0.8111	0.001919	down	map00460;map01100;map01110	Cyanoamino acid metabolism;Metabolic pathways;Biosynthesis of secondary metabolites
43	173.092	neg	Glycylvaline	0.003708	2.9741	2.924	0.6455	-0.6315	0.000244	down	-	-
44	429.101	pos	Glucobrassicanapin	0.004035	2.8931	2.9031	0.6472	-0.6277	0.0002792	down	-	-
45	316.119	pos	Citpressine II	0.03695	2.844	2.902	1.5354	0.6186	0.00659	up	-	-
46	318.134	pos	Melilotocarpan A	0.01736	2.8236	2.8588	1.6737	0.743	0.002272	up	-	-
47	153.055	neg	2,6-Dihydroxy-4-Methoxytoluene	0.001046	2.8034	2.7831	1.5532	0.6353	3.357E-5	up	-	-
48	334.11	neg	2-Amino-5-[[1-(carboxymethylamino)-3-ethylsulfanyl-1-oxopropan-2-yl]amino]-5-oxopentanoic acid	0.1288	2.7843	2.75	1.5033	0.5881	0.04118	up	-	-
49	380.28	neg	Pentadeca-5,12-dienoylcarnitine	0.1267	2.7769	2.8118	1.6232	0.6989	0.04027	up	-	-
50	451.172	pos	N-((6-Methyl-5-oxo-3-thiomorpholinyl)carbonyl)-L-histidyl-L-proline	0.02565	2.7644	2.7547	1.6494	0.7219	0.003914	up	-	-
51	237.088	neg	Glycyl-L-Tyrosine	0.05479	2.7567	2.699	0.6593	-0.6009	0.01181	down	-	-
52	454.114	neg	Glycine, L-gamma-glutamyl-2-(1-methyl-4-(nitrosothio)-4-piperidinyl)glycyl-	0.03987	2.7138	2.7629	1.6798	0.7483	0.007349	up	-	-
53	465.272	pos	LysoPE(0:0/14:1(9Z))	0.01599	2.6944	2.7259	1.6181	0.6943	0.002027	up	-	-
54	353.135	neg	Gibberellin A40	0.08818	2.6623	2.7485	1.6344	0.7087	0.02364	up	map01110;map00904	Biosynthesis of secondary metabolites;Diterpenoid biosynthesis
55	259.061	neg	1,10-dihydro-1,10-dihydroxyfluoren-9-one	0.04864	2.5779	2.6362	1.5019	0.5868	0.009843	up	-	-
56	320.125	pos	Xenognosin A	0.06672	2.4715	2.5072	0.627	-0.6734	0.01571	down	-	-
57	422.145	pos	Cassiaside	0.1012	2.4713	2.5771	1.7419	0.8007	0.02891	up	-	-
